# Supplementary material for: Genie: an interactive real-time simulation for teaching genetic drift
Source: Evolution (N Y). Author manuscript; Available in PMC 2022 Oct 12. (PMC9555832; doi:10.1186/s12052-022-00161-7)
Supplement: SFile3_Genie — Additional file 3. R code used to conduct the analyses in this study. Code to perform the analyses after removing honor students from the population is also included. Participant’s data was split into multiple files to facilitate code modularity. Additional files 4–13 represent the data used on the study by different segments of the R code. [file NIHMS1805352-supplement-SFile3_Genie.r]

#install.packages("fitdistrplus")
#install.packages("logspline")
#install.packages("effsize")
#install.packages("betareg")
#install.packages("ggplot2")
#install.packages("PairedData")
#install.packages("tidyr")
#install.packages("tidyverse")

#Please change this path to your working directory
setwd("/Users/Andreina/Desktop/Genie_new/manuscript_all")

library(fitdistrplus)
library(logspline)
library(effsize)
library(betareg)
library(ggplot2)
library(PairedData)
library(RColorBrewer)
library(ggpubr)
library(dplyr)
options(tidyverse.quiet = TRUE)
library(tidyverse)
library(glue)
display.brewer.all(n=NULL, type="all", select=NULL, exact.n=TRUE, 
                   colorblindFriendly=TRUE)


#Demographic analyses
demographics_2016 <- read.table("Sfile4_BIO345_DEMOGRAPHICS_2016.txt", header = TRUE, sep = "\t")
head(demographics_2016)
demographics_2017_GENIE <- read.table("Sfile5_BIO345_DEMOGRAPHICS_2017_GENIE.txt", header = TRUE, sep = "\t")
head(demographics_2017_GENIE)
demographics_2017_NOGENIE <- read.table("Sfile6_BIO345_DEMOGRAPHICS_2017_NOGENIE.txt", header = TRUE, sep = "\t")
head(demographics_2017_NOGENIE)

##############################################################################################
#Counting the number of invididuals per demographic group per class
year <- rep("2016", 406)
demographics_2016 <- cbind(demographics_2016, year)
demo2016 <- select(demographics_2016, time, Gender, First_Gen, Ethnicity, year)
year <- rep("2017G", 280)
demographics_2017_GENIE <- cbind(demographics_2017_GENIE, year)
demo2017G <- select(demographics_2017_GENIE, time, Gender, First_Gen, Ethnicity, year)
year <- rep("2017NG", 232)
demographics_2017_NOGENIE <- cbind(demographics_2017_NOGENIE, year)
demo2017NG <- select(demographics_2017_NOGENIE, time, Gender, First_Gen, Ethnicity, year)

total <- rbind(demo2016, demo2017G, demo2017NG)

Ethinicy_contingency_table <- table(total$Ethnicity, total$year)
Gender_contingency_table <- table(total$Gender, total$year)
First_Gen_contingency_table <- table(total$First_Gen, total$year)

#Writing output to text
sink('T1_demographic_output.txt', append=TRUE)
Ethinicy_contingency_table
Gender_contingency_table
First_Gen_contingency_table
sink()

############################################################################################
#Are scores demographic dependent on either 2016 or 2017 classes?
demographics_2016_glm <- read.table("Sfile7_BIO345_DEMOGRAPHICS_2016.txt", header = TRUE, sep = "\t")
head(demographics_2016_glm)
demographics_2017_glm <- read.table("Sfile8_BIO345_DEMOGRAPHICS_2017.txt", header = TRUE, sep = "\t")
head(demographics_2017_glm)

#Pre-recitation scores 2016
glm_demo_2016_pre <- lm(score_pre ~ First_Gen * Ethnicity * Gender, data=demographics_2016_glm)
anova(glm_demo_2016_pre)
#Post-recitation scores 2016
glm_demo_2016_post <- lm(score_post ~ First_Gen * Ethnicity * Gender, data=demographics_2016_glm)
anova(glm_demo_2016_post)
#Pre-recitation scores 2017
glm_demo_2017_pre <- lm(score_pre ~ First_Gen * Ethnicity * Gender * Genie_used, data=demographics_2017_glm)
anova(glm_demo_2017_pre)
#Post-recitation scores 2017
glm_demo_2017_post <- lm(score_post ~ First_Gen * Ethnicity * Gender * Genie_used, data=demographics_2017_glm)
anova(glm_demo_2017_post)


#Writing output to text
sink('T2_anova_output.txt', append=TRUE)
cat("ANOVA on pre-recitation scores 2016\n")
anova(glm_demo_2016_pre)
cat("\n\n")
cat("=============================\n")
cat("ANOVA on post-recitation scores 2016\n")
anova(glm_demo_2016_post)
cat("\n\n")
cat("=============================\n")
cat("ANOVA on pre-recitation scores 2017\n")
anova(glm_demo_2017_pre)
cat("\n\n")
cat("=============================\n")
cat("ANOVA on post-recitation scores 2017\n")
anova(glm_demo_2017_post)
sink()

############################################################################################
#Input the results of both years and treatments
combined_years <- read.table("Sfile9_COMBINED_TABLE_FOR_DF.txt", header = TRUE, sep = "\t")
head(combined_years)

#Splits the data frame into years and treatments
split_years <- split(combined_years, combined_years$year)
df_2016 <- split_years[[1]]
head(df_2016)
df_2017_G <- split_years[[2]]
head(df_2017_G)
df_2017_NG <- split_years[[3]]
head(df_2017_NG)

#Fitting the data to a distribution
descdist(df_2016$score_pre, discrete = F) #beta distributionn
descdist(df_2016$score_post, discrete = F) #beta distribution
fit.beta_pre_2016 <- fitdist(df_2016$score_pre, "beta", method = "mme")
fit.beta_post_2016 <- fitdist(df_2016$score_post, "beta", method = "mme")
plot(fit.beta_pre_2016)
plot(fit.beta_post_2016)

descdist(df_2017_G$score_pre, discrete = F) #beta distributionn
descdist(df_2017_G$score_post, discrete = F) #beta distribution
fit.beta_pre_2017_G <- fitdist(df_2017_G$score_pre, "beta", method = "mme")
fit.beta_post_2017_G <- fitdist(df_2017_G$score_post, "beta", method = "mme")
plot(fit.beta_pre_2017_G)
plot(fit.beta_post_2017_G)

descdist(df_2017_NG$score_pre, discrete = F) #beta distributionn
descdist(df_2017_NG$score_post, discrete = F) #beta distribution
fit.beta_pre_2017_NG <- fitdist(df_2017_NG$score_pre, "beta", method = "mme")
fit.beta_post_2017_NG <- fitdist(df_2017_NG$score_post, "beta", method = "mme")
plot(fit.beta_pre_2017_NG)
plot(fit.beta_post_2017_NG)


############################################################################################
#Beta regression models
#Function to transform y values to be used on a betareg distribution
y.transf.betareg <- function(y){
  n.obs <- sum(!is.na(y))
  (y * (n.obs - 1) + 0.5) / n.obs
}

#Are the pre-recitation scores different across years (use of Genie or not)?
effect_combined_years_pre <- betareg(y.transf.betareg(score_pre) ~  year, data=combined_years, link = "logit")
summary(effect_combined_years_pre)
#Are the post-recitation scores across years dependent of the pre-recitation scores and/or the year of instruction (use of Genie or not)?
effect_combined_years <- betareg(y.transf.betareg(score_post) ~ score_pre + year, data=combined_years, link = "logit")
summary(effect_combined_years)
#Are the post-recitation scores on 2016 dependent of the pre-recitation scores and/or the class section?
effect_test_2016 <- betareg(y.transf.betareg(score_post) ~ score_pre + class, data=df_2016, link = "logit")
summary(effect_test_2016)
#Are the post-recitation scores on 2017 dependent of the pre-recitation scores and/or the class section when using Genie?
effect_test_2017_G <- betareg(y.transf.betareg(score_post) ~ score_pre + class, data=df_2017_G, link = "logit")
summary(effect_test_2017_G)
#Are the post-recitation scores on 2017 dependent of the pre-recitation scores and/or the class section when not using Genie?
effect_test_2017_NG <- betareg(y.transf.betareg(score_post) ~ score_pre + class, data=df_2017_NG, link = "logit")
summary(effect_test_2017_NG)


#Writing output to text
sink('T3_betareg_output.txt', append=TRUE)
cat("Betareg on pre-recitation scores across years\n")
summary(effect_combined_years_pre)
cat("\n\n")
cat("=============================\n")
cat("Betareg on pre-recitation scores across years\n")
summary(effect_combined_years)
cat("\n\n")
cat("=============================\n")
cat("Betareg on postrecitation scores 2016\n")
summary(effect_test_2016)
cat("\n\n")
cat("=============================\n")
cat("Betareg on postrecitation scores 2017 Genie\n")
summary(effect_test_2017_G)
cat("\n\n")
cat("=============================\n")
cat("Betareg on postrecitation scores 2017 Non-genie\n")
summary(effect_test_2017_NG)
sink()

############################################################################################
#Size effect testing
#Transforms the scores columns on each data frame into a numeric vector
score_post_2016 <- as.numeric(as.character(df_2016$score_post))
score_pre_2016 <- as.numeric(as.character(df_2016$score_pre))
score_diff_2016 <- as.numeric(as.character(df_2016$diff))

score_post_2017_G <- as.numeric(as.character(df_2017_G$score_post))
score_pre_2017_G <- as.numeric(as.character(df_2017_G$score_pre))
score_diff_2017_G <- as.numeric(as.character(df_2017_G$diff))

score_post_2017_NG <- as.numeric(as.character(df_2017_NG$score_post))
score_pre_2017_NG <- as.numeric(as.character(df_2017_NG$score_pre))
score_diff_2017_NG <- as.numeric(as.character(df_2017_NG$diff))

#Are the scores different before and after instruction on 2016 (Genie)? 
cohens_prepost_2016 <- cohen.d(score_post_2016,score_pre_2016)
#Are the scores different before and after instruction on 2017 (Genie)? 
cohens_prepost_2017G <- cohen.d(score_post_2017_G,score_pre_2017_G)
#Are the scores different before and after instruction on 2017 (No Genie)? 
cohens_prepost_2017NG <- cohen.d(score_post_2017_NG,score_pre_2017_NG)
#Are the pre-recitation scores different between 2017's Genie and Non Genie classes? 
cohens_pre_2017GNG <- cohen.d(score_pre_2017_G,score_pre_2017_NG)
#Are the post-recitation scores different between 2017's Genie and Non Genie classes? 
cohens_post_2017GNG <- cohen.d(score_post_2017_G,score_post_2017_NG)
#Are the difference in pre- and post-recitation scores different between 2017's Genie and Non Genie classes? 
cohens_diff_2017GNG <- cohen.d(score_diff_2017_G,score_diff_2017_NG)

mean(score_pre_2016)
mean(score_post_2016)
mean(score_pre_2017_G)
mean(score_post_2017_G)
mean(score_pre_2017_NG)
mean(score_post_2017_NG)

#Writing output to text
sink('T4_cohenD_output.txt', append=TRUE)
cat("Cohen's d for pre- vs. post-recitation 2016\n")
cohens_prepost_2016
cat("=============================\n")
cat("Cohen's d for pre- vs. post-recitation 2017 Genie\n")
cohens_prepost_2017G
cat("=============================\n")
cat("Cohen's d for pre- vs. post-recitation 2017 Non-genie\n")
cohens_prepost_2017NG
cat("=============================\n")
cat("Cohen's d for pre-recitation 2017 Genie vs. Non-genie\n")
cohens_pre_2017GNG
cat("=============================\n")
cat("Cohen's d for post-recitation 2017 Genie vs. Non-genie\n")
cohens_post_2017GNG
cat("=============================\n")
cat("Cohen's d for diff between pre- and post-recitation 2017 Genie vs. Non-genie\n")
cohens_diff_2017GNG
sink()


############################################################################################
#Paired Student t-test of pre- vs post-recitation performance
#2016
t.test(score_pre_2016, score_post_2016, paired = TRUE, p.adj = "bonf")
#2017G
t.test(score_pre_2017_G, score_post_2017_G, paired = TRUE, p.adj = "bonf")
#2017NG
t.test(score_pre_2017_NG, score_post_2017_NG, paired = TRUE, p.adj = "bonf")


#Writing output to text
sink('T5_paired_t_test.txt', append=TRUE)
cat("Paired Student t-test of pre- vs post-recitation performance in 2016\n")
t.test(score_pre_2016, score_post_2016, paired = TRUE, p.adj = "bonf")
cat("=============================\n")
cat("Paired Student t-test of pre- vs post-recitation performance in 2017 Genie\n")
t.test(score_pre_2017_G, score_post_2017_G, paired = TRUE, p.adj = "bonf")
cat("=============================\n")
cat("Paired Student t-test of pre- vs post-recitation performance in 2017 Non-genie\n")
t.test(score_pre_2017_NG, score_post_2017_NG, paired = TRUE, p.adj = "bonf")
sink()

############################################################################################
#Visualization of performance on each year via violin plots
VIOLINPLOT_2016_PRE_POST <- read.table("Sfile11_VIOLINPLOT_2016_PRE_POST.txt", header = TRUE, sep = "\t")
head(VIOLINPLOT_2016_PRE_POST)

VIOLINPLOT_2017_GENIE_PRE_POST <- read.table("Sfile12_VIOLINPLOT_2017_GENIE_PRE_POST.txt", header = TRUE, sep = "\t")
head(VIOLINPLOT_2017_GENIE_PRE_POST)

VIOLINPLOT_2017_NOGENIE_PRE_POST <- read.table("Sfile13_VIOLINPLOT_2017_NOGENIE_PRE_POST.txt", header = TRUE, sep = "\t")
head(VIOLINPLOT_2017_NOGENIE_PRE_POST)


require(gridExtra)
VIOLINPLOT_2016 <- ggplot(VIOLINPLOT_2016_PRE_POST, aes(x = year, y = score, fill=year)) +
  scale_y_continuous(limits = c(0, 1.1), breaks = seq(0, 1.1, by = 0.1)) +
  scale_x_discrete(labels=c(".Pre-recitation_score_2016" = "Pre-recitation", "Post-recitation_score_2016" = "Post-recitation")) + xlab("") +
  labs(title="Genie 2016", y ="Scores")+
  theme_bw() + 
  theme(panel.border = element_blank(), panel.grid.major = element_blank(), panel.grid.minor = element_blank(), axis.line = element_line(colour = "black")) +
  theme(legend.position = "none") +
  scale_fill_brewer(palette="Dark2") + 
  geom_violin(trim=FALSE) + 
  geom_jitter(shape=16, position=position_jitter(0.1), col="black")

VIOLINPLOT_2017_GENIE <- ggplot(VIOLINPLOT_2017_GENIE_PRE_POST, aes(x = year, y = score, fill=year)) +
  scale_y_continuous(limits = c(0, 1.1), breaks = seq(0, 1.1, by = 0.1)) +
  scale_x_discrete(labels=c(".Pre-recitation_score_2017" = "Pre-recitation", "Post-recitation_score_2017" = "Post-recitation")) + xlab("") +
  labs(title="Genie 2017", y ="Scores")+
  theme_bw() + 
  theme(panel.border = element_blank(), panel.grid.major = element_blank(), panel.grid.minor = element_blank(), axis.line = element_line(colour = "black")) +
  theme(legend.position = "none") +
  scale_fill_brewer(palette="Dark2") + 
  geom_violin(trim=FALSE) + 
  geom_jitter(shape=16, position=position_jitter(0.1), col="black")

VIOLINPLOT_2017_NOGENIE <- ggplot(VIOLINPLOT_2017_NOGENIE_PRE_POST, aes(x = year, y = score, fill=year)) +
  scale_y_continuous(limits = c(0, 1.1), breaks = seq(0, 1.1, by = 0.1)) +
  scale_x_discrete(labels=c(".Pre-recitation_score_2017" = "Pre-recitation", "Post-recitation_score_2017" = "Post-recitation")) + xlab("") +
  labs(title="Non-Genie 2017", y ="Scores")+
  theme_bw() + 
  theme(panel.border = element_blank(), panel.grid.major = element_blank(), panel.grid.minor = element_blank(), axis.line = element_line(colour = "black")) +
  theme(legend.position = "none") +
  scale_fill_brewer(palette="Dark2") + 
  geom_violin(trim=FALSE) + 
  geom_jitter(shape=16, position=position_jitter(0.1), col="black")


#Paired student plot
pd <- position_dodge(0.01)

PAIRED_STUDENT_2016 <- ggplot(VIOLINPLOT_2016_PRE_POST, aes(x = year, y = score)) +
  scale_y_continuous(limits = c(0, 1.1), breaks = seq(0, 1.1, by = 0.1)) +
  scale_x_discrete(labels=c(".Pre-recitation_score_2016" = "Pre-recitation", "Post-recitation_score_2016" = "Post-recitation")) + xlab("") +
  labs(title="Genie 2016", y ="Scores")+
  theme_bw() + 
  theme(panel.border = element_blank(), panel.grid.major = element_blank(), panel.grid.minor = element_blank(), axis.line = element_line(colour = "black")) +
  theme(legend.position = "none") +
  geom_line(aes(group = student, color=student), position = pd) +
  geom_point(position = pd)

PAIRED_STUDENT_2017_GENIE <- ggplot(VIOLINPLOT_2017_GENIE_PRE_POST, aes(x = year, y = score)) +
  scale_y_continuous(limits = c(0, 1.1), breaks = seq(0, 1.1, by = 0.1)) +
  scale_x_discrete(labels=c(".Pre-recitation_score_2017" = "Pre-recitation", "Post-recitation_score_2017" = "Post-recitation")) + xlab("") +
  labs(title="Genie 2017", y ="")+
  theme_bw() + 
  theme(panel.border = element_blank(), panel.grid.major = element_blank(), panel.grid.minor = element_blank(), axis.line = element_line(colour = "black")) +
  theme(legend.position = "none") +
  geom_line(aes(group = student, color=student), position = pd) +
  geom_point(position = pd)

PAIRED_STUDENT_2017_NOGENIE <- ggplot(VIOLINPLOT_2017_NOGENIE_PRE_POST, aes(x = year, y = score)) +
  scale_y_continuous(limits = c(0, 1.1), breaks = seq(0, 1.1, by = 0.1)) +
  scale_x_discrete(labels=c(".Pre-recitation_score_2017" = "Pre-recitation", "Post-recitation_score_2017" = "Post-recitation")) + xlab("") +
  labs(title="Non-Genie 2017", y ="") +
  theme_bw() + 
  theme(panel.border = element_blank(), panel.grid.major = element_blank(), panel.grid.minor = element_blank(), axis.line = element_line(colour = "black")) +
  theme(legend.position = "none") +
  geom_line(aes(group = student, color=student), position = pd) +
  geom_point(position = pd)

pdf(file="Sfile14_violinplots.pdf")

FS14 <- ggarrange(PAIRED_STUDENT_2016, PAIRED_STUDENT_2017_GENIE, PAIRED_STUDENT_2017_NOGENIE, ncol=3)

print(FS14)
dev.off()


############################################################################################
#Testing performance per question
rawdat <- read_tsv("Sfile10_RESULTS_COMPILED_BY_QUESTION.txt")

# Calculate McNemar's Test Statistic
# https://en.wikipedia.org/wiki/McNemar%27s_test
mcnemar_stat <- function(b,c) {
  (b-c)^2/(b+c)
}

# Reshape the input data so that each year-student-question has its own line.
# Each observation will have a Pre and Post Stat
dat <- rawdat %>% pivot_longer(!c(year,class,student)) %>%
  separate("name", c("quiz", "question"), sep="_") %>%
  mutate(question = as.integer(question)) %>%
  pivot_wider(names_from="quiz",values_from="value")

# Count for each year-question the interaction of pre and post.
# use these counts to measure McNemar's statistic and its pvalue.
datn1 <- dat %>% mutate(result = glue("ans_{Pre}_{Post}")) %>%
  count(year, question, result) %>%
  pivot_wider(names_from="result",values_from="n", values_fill=list(n=0L)) %>%
  mutate(mcnemar_stat =  mcnemar_stat(ans_1_0, ans_0_1),
         mcnemar_pvalue = pchisq(mcnemar_stat, 1L, lower.tail = FALSE))

# Save Results
write_tsv(datn1,"T6_mcnemar.tsv")

perQ_scores_2016_pval <- c(0.182,
                           2.88e-09,
                           0.086,
                           4.02e-05,
                           0.14,
                           2.79e-15,
                           0.075,
                           0.069,
                           9.37e-06,
                           6.15e-05,
                           0.004,
                           0.09,
                           0.317,
                           2.71e-05,
                           3.84e-08,
                           0.004,
                           0.113,
                           0.729,
                           1,
                           5.54e-05,
                           5.56e-04,
                           0.579)


perQ_scores_G2017_pval <- c(0.317,
                            0.012,
                            0.072,
                            0.353,
                            0.002,
                            9.05e-06,
                            0.077,
                            0.04,
                            3.96e-05,
                            5.73e-09,
                            3.83e-05,
                            0.063,
                            0.004,
                            3.96e-05,
                            2.21e-07,
                            2.56e-04,
                            3.59e-04,
                            0.853,
                            0.013,
                            0.003,
                            0.018,
                            0.005)

perQ_scores_NG2017_pval <- c(0.059,
                             0.102,
                             0.007,
                             0.549,
                             0.003,
                             2.78e-08,
                             0.691,
                             0.024,
                             9.43e-08,
                             8.98e-12,
                             5.97e-07,
                             1,
                             0.006,
                             6.07e-04,
                             1.86e-06,
                             0.012,
                             0.003,
                             0.014,
                             0.002,
                             9.05e-06,
                             0.033,
                             0.273)


p.adjust(perQ_scores_2016_pval, "bonferroni", n = length(perQ_scores_2016_pval))
p.adjust(perQ_scores_G2017_pval, "bonferroni", n = length(perQ_scores_G2017_pval))
p.adjust(perQ_scores_NG2017_pval, "bonferroni", n = length(perQ_scores_NG2017_pval))

############################################################################################
#Comparing 2017 genie vs non-genie classes performance per question
rawdat <- read_tsv("Sfile10_RESULTS_COMPILED_BY_QUESTION.txt")

dat0 <- rawdat %>% pivot_longer(!c(year,class,student)) %>%
  separate("name", c("quiz", "question"), sep="_") %>%
  mutate(question = as.integer(question)) %>%
  pivot_wider(names_from="quiz",values_from="value")

write_tsv(dat0,"pre_and_post.tsv")

dat <- read_tsv("pre_and_post.tsv")

# Compare 2017 Genie and 2017 Not Genie on pre and post
# Use Fisher's exact tests to test the association between question switching and
# type of instruction.

dat1 <- dat %>% mutate(result = str_glue("ans_{Pre}_{Post}")) %>%
  count(year, question, result) %>%
  pivot_wider(names_from="result",values_from="n", values_fill=list(n=0L)) %>%
  filter( year %in% c("2017_Genie", "2017_No_Genie"))

dat2 <- dat1 %>% select(year,question,ans_0_1,ans_1_0) %>%
  pivot_wider(names_from="year", values_from=c(ans_0_1,ans_1_0))

f <- function(a,b,c,d) {
  m <- matrix(c(a,b,c,d),nrow=2)
  v <- fisher.test(m)
  data.frame(OR.est=v$estimate, p.value=v$p.value)
}

dat3 <- dat2 %>% rowwise() %>% summarize(f(ans_0_1_2017_Genie, ans_0_1_2017_No_Genie, ans_1_0_2017_Genie, ans_1_0_2017_No_Genie))
dat4 <- bind_cols(dat2,dat3)

write_tsv(dat4,"T7_genie_vs_non.tsv")

pal_okabe_ito <- c("#E69F00", "#56B4E9", "#009E73", "#F0E442", "#0072B2", "#D55E00", "#CC79A7", "#000000")

dat <- read_tsv("pre_and_post.tsv")


dat.A <- dat %>% mutate(result = str_glue("ans_{Pre}_{Post}")) %>%
  count(year, student, result) %>%
  pivot_wider(names_from="result",values_from="n", values_fill=list(n=0L)) %>%
  mutate(pre_acc = (ans_1_1+ans_1_0),
         post_acc = (ans_1_1+ans_0_1))
dat.B <- dat.A %>% mutate(diff = post_acc - pre_acc, diffs = sign(diff), excess = "no") %>%
  arrange(diff)

dat4 <- dat.B %>% group_by(year) %>% group_modify(function(tbl,y){
  j <- tail(1:nrow(tbl),sum(tbl$diffs))
  tbl$excess[j] <- "yes"
  tbl
})

pretty_year <- c(
  `2016_Genie` = "Genie 2016",
  `2017_Genie` = "Genie 2017",
  `2017_No_Genie` = "Non-Genie 2017"
)

ann_tbl <- tibble(pre_acc=10,post_acc=2.5,year="2017_No_Genie",excess="yes")

pdf(file="F1.pdf")

set.seed(0x90210)
gg <- ggplot(dat4, aes(x=pre_acc,y=post_acc,color=excess)) + geom_jitter(width=0.3,height=0.3)
gg <- gg + geom_abline(slope=1,intercept=0)
gg <- gg + labs(x = "Pre-Score", y = "Post-Score")
gg <- gg + theme_minimal() + coord_fixed(xlim=c(0,22),ylim=c(0,22))
gg <- gg + facet_wrap(~year, labeller = labeller(year = pretty_year))
gg <- gg + scale_color_manual(values=pal_okabe_ito[c(8,2)])
gg <- gg + theme(legend.position = "none")
gg <- gg + geom_label(data=ann_tbl,label="        Excess\n        Improvement",hjust="left", nudge_x=-2,color="black",size=3) +
  geom_point(data=ann_tbl,size=5)
print(gg)
dev.off()


############################################################################################
compiled_years_by_question <- read.table("Sfile10_RESULTS_COMPILED_BY_QUESTION.txt", header = TRUE, sep = "\t")
split_years_by_year <- split(compiled_years_by_question, compiled_years_by_question$year)
df_2016_by_year <- split_years_by_year[[1]]
df_2017_G_by_year <- split_years_by_year[[2]]
df_2017_NG_by_year <- split_years_by_year[[3]]

#Transforms the pre-recitation scores columns on each data frame into a numeric vector
score_pre1_2017_G <- as.numeric(as.character(df_2017_G_by_year$Pre_1))
score_pre2_2017_G <- as.numeric(as.character(df_2017_G_by_year$Pre_2))
score_pre3_2017_G <- as.numeric(as.character(df_2017_G_by_year$Pre_3))
score_pre4_2017_G <- as.numeric(as.character(df_2017_G_by_year$Pre_4))
score_pre5_2017_G <- as.numeric(as.character(df_2017_G_by_year$Pre_5))
score_pre6_2017_G <- as.numeric(as.character(df_2017_G_by_year$Pre_6))
score_pre7_2017_G <- as.numeric(as.character(df_2017_G_by_year$Pre_7))
score_pre8_2017_G <- as.numeric(as.character(df_2017_G_by_year$Pre_8))
score_pre9_2017_G <- as.numeric(as.character(df_2017_G_by_year$Pre_9))
score_pre10_2017_G <- as.numeric(as.character(df_2017_G_by_year$Pre_10))
score_pre11_2017_G <- as.numeric(as.character(df_2017_G_by_year$Pre_11))
score_pre12_2017_G <- as.numeric(as.character(df_2017_G_by_year$Pre_12))
score_pre13_2017_G <- as.numeric(as.character(df_2017_G_by_year$Pre_13))
score_pre14_2017_G <- as.numeric(as.character(df_2017_G_by_year$Pre_14))
score_pre15_2017_G <- as.numeric(as.character(df_2017_G_by_year$Pre_15))
score_pre16_2017_G <- as.numeric(as.character(df_2017_G_by_year$Pre_16))
score_pre17_2017_G <- as.numeric(as.character(df_2017_G_by_year$Pre_17))
score_pre18_2017_G <- as.numeric(as.character(df_2017_G_by_year$Pre_18))
score_pre19_2017_G <- as.numeric(as.character(df_2017_G_by_year$Pre_19))
score_pre20_2017_G <- as.numeric(as.character(df_2017_G_by_year$Pre_20))
score_pre21_2017_G <- as.numeric(as.character(df_2017_G_by_year$Pre_21))
score_pre22_2017_G <- as.numeric(as.character(df_2017_G_by_year$Pre_22))

score_pre1_2017_NG <- as.numeric(as.character(df_2017_NG_by_year$Pre_1))
score_pre2_2017_NG <- as.numeric(as.character(df_2017_NG_by_year$Pre_2))
score_pre3_2017_NG <- as.numeric(as.character(df_2017_NG_by_year$Pre_3))
score_pre4_2017_NG <- as.numeric(as.character(df_2017_NG_by_year$Pre_4))
score_pre5_2017_NG <- as.numeric(as.character(df_2017_NG_by_year$Pre_5))
score_pre6_2017_NG <- as.numeric(as.character(df_2017_NG_by_year$Pre_6))
score_pre7_2017_NG <- as.numeric(as.character(df_2017_NG_by_year$Pre_7))
score_pre8_2017_NG <- as.numeric(as.character(df_2017_NG_by_year$Pre_8))
score_pre9_2017_NG <- as.numeric(as.character(df_2017_NG_by_year$Pre_9))
score_pre10_2017_NG <- as.numeric(as.character(df_2017_NG_by_year$Pre_10))
score_pre11_2017_NG <- as.numeric(as.character(df_2017_NG_by_year$Pre_11))
score_pre12_2017_NG <- as.numeric(as.character(df_2017_NG_by_year$Pre_12))
score_pre13_2017_NG <- as.numeric(as.character(df_2017_NG_by_year$Pre_13))
score_pre14_2017_NG <- as.numeric(as.character(df_2017_NG_by_year$Pre_14))
score_pre15_2017_NG <- as.numeric(as.character(df_2017_NG_by_year$Pre_15))
score_pre16_2017_NG <- as.numeric(as.character(df_2017_NG_by_year$Pre_16))
score_pre17_2017_NG <- as.numeric(as.character(df_2017_NG_by_year$Pre_17))
score_pre18_2017_NG <- as.numeric(as.character(df_2017_NG_by_year$Pre_18))
score_pre19_2017_NG <- as.numeric(as.character(df_2017_NG_by_year$Pre_19))
score_pre20_2017_NG <- as.numeric(as.character(df_2017_NG_by_year$Pre_20))
score_pre21_2017_NG <- as.numeric(as.character(df_2017_NG_by_year$Pre_21))
score_pre22_2017_NG <- as.numeric(as.character(df_2017_NG_by_year$Pre_22))

#Gets score for each question
score_pre1_2017_G_val <- sum(score_pre1_2017_G)/length(score_pre1_2017_G)
score_pre2_2017_G_val <- sum(score_pre2_2017_G)/length(score_pre2_2017_G)
score_pre3_2017_G_val <- sum(score_pre3_2017_G)/length(score_pre3_2017_G)
score_pre4_2017_G_val <- sum(score_pre4_2017_G)/length(score_pre4_2017_G)
score_pre5_2017_G_val <- sum(score_pre5_2017_G)/length(score_pre5_2017_G)
score_pre6_2017_G_val <- sum(score_pre6_2017_G)/length(score_pre6_2017_G)
score_pre7_2017_G_val <- sum(score_pre7_2017_G)/length(score_pre7_2017_G)
score_pre8_2017_G_val <- sum(score_pre8_2017_G)/length(score_pre8_2017_G)
score_pre9_2017_G_val <- sum(score_pre9_2017_G)/length(score_pre9_2017_G)
score_pre10_2017_G_val <- sum(score_pre10_2017_G)/length(score_pre10_2017_G)
score_pre11_2017_G_val <- sum(score_pre11_2017_G)/length(score_pre11_2017_G)
score_pre12_2017_G_val <- sum(score_pre12_2017_G)/length(score_pre12_2017_G)
score_pre13_2017_G_val <- sum(score_pre13_2017_G)/length(score_pre13_2017_G)
score_pre14_2017_G_val <- sum(score_pre14_2017_G)/length(score_pre14_2017_G)
score_pre15_2017_G_val <- sum(score_pre15_2017_G)/length(score_pre15_2017_G)
score_pre16_2017_G_val <- sum(score_pre16_2017_G)/length(score_pre16_2017_G)
score_pre17_2017_G_val <- sum(score_pre17_2017_G)/length(score_pre17_2017_G)
score_pre18_2017_G_val <- sum(score_pre18_2017_G)/length(score_pre18_2017_G)
score_pre19_2017_G_val <- sum(score_pre19_2017_G)/length(score_pre19_2017_G)
score_pre20_2017_G_val <- sum(score_pre20_2017_G)/length(score_pre20_2017_G)
score_pre21_2017_G_val <- sum(score_pre21_2017_G)/length(score_pre21_2017_G)
score_pre22_2017_G_val <- sum(score_pre22_2017_G)/length(score_pre22_2017_G)

score_pre1_2017_NG_val <- sum(score_pre1_2017_NG)/length(score_pre1_2017_NG)
score_pre2_2017_NG_val <- sum(score_pre2_2017_NG)/length(score_pre2_2017_NG)
score_pre3_2017_NG_val <- sum(score_pre3_2017_NG)/length(score_pre3_2017_NG)
score_pre4_2017_NG_val <- sum(score_pre4_2017_NG)/length(score_pre4_2017_NG)
score_pre5_2017_NG_val <- sum(score_pre5_2017_NG)/length(score_pre5_2017_NG)
score_pre6_2017_NG_val <- sum(score_pre6_2017_NG)/length(score_pre6_2017_NG)
score_pre7_2017_NG_val <- sum(score_pre7_2017_NG)/length(score_pre7_2017_NG)
score_pre8_2017_NG_val <- sum(score_pre8_2017_NG)/length(score_pre8_2017_NG)
score_pre9_2017_NG_val <- sum(score_pre9_2017_NG)/length(score_pre9_2017_NG)
score_pre10_2017_NG_val <- sum(score_pre10_2017_NG)/length(score_pre10_2017_NG)
score_pre11_2017_NG_val <- sum(score_pre11_2017_NG)/length(score_pre11_2017_NG)
score_pre12_2017_NG_val <- sum(score_pre12_2017_NG)/length(score_pre12_2017_NG)
score_pre13_2017_NG_val <- sum(score_pre13_2017_NG)/length(score_pre13_2017_NG)
score_pre14_2017_NG_val <- sum(score_pre14_2017_NG)/length(score_pre14_2017_NG)
score_pre15_2017_NG_val <- sum(score_pre15_2017_NG)/length(score_pre15_2017_NG)
score_pre16_2017_NG_val <- sum(score_pre16_2017_NG)/length(score_pre16_2017_NG)
score_pre17_2017_NG_val <- sum(score_pre17_2017_NG)/length(score_pre17_2017_NG)
score_pre18_2017_NG_val <- sum(score_pre18_2017_NG)/length(score_pre18_2017_NG)
score_pre19_2017_NG_val <- sum(score_pre19_2017_NG)/length(score_pre19_2017_NG)
score_pre20_2017_NG_val <- sum(score_pre20_2017_NG)/length(score_pre20_2017_NG)
score_pre21_2017_NG_val <- sum(score_pre21_2017_NG)/length(score_pre21_2017_NG)
score_pre22_2017_NG_val <- sum(score_pre22_2017_NG)/length(score_pre22_2017_NG)


#Transforms the post-recitation scores columns on each data frame into a numeric vector
score_post1_2017_G <- as.numeric(as.character(df_2017_G_by_year$Post_1))
score_post2_2017_G <- as.numeric(as.character(df_2017_G_by_year$Post_2))
score_post3_2017_G <- as.numeric(as.character(df_2017_G_by_year$Post_3))
score_post4_2017_G <- as.numeric(as.character(df_2017_G_by_year$Post_4))
score_post5_2017_G <- as.numeric(as.character(df_2017_G_by_year$Post_5))
score_post6_2017_G <- as.numeric(as.character(df_2017_G_by_year$Post_6))
score_post7_2017_G <- as.numeric(as.character(df_2017_G_by_year$Post_7))
score_post8_2017_G <- as.numeric(as.character(df_2017_G_by_year$Post_8))
score_post9_2017_G <- as.numeric(as.character(df_2017_G_by_year$Post_9))
score_post10_2017_G <- as.numeric(as.character(df_2017_G_by_year$Post_10))
score_post11_2017_G <- as.numeric(as.character(df_2017_G_by_year$Post_11))
score_post12_2017_G <- as.numeric(as.character(df_2017_G_by_year$Post_12))
score_post13_2017_G <- as.numeric(as.character(df_2017_G_by_year$Post_13))
score_post14_2017_G <- as.numeric(as.character(df_2017_G_by_year$Post_14))
score_post15_2017_G <- as.numeric(as.character(df_2017_G_by_year$Post_15))
score_post16_2017_G <- as.numeric(as.character(df_2017_G_by_year$Post_16))
score_post17_2017_G <- as.numeric(as.character(df_2017_G_by_year$Post_17))
score_post18_2017_G <- as.numeric(as.character(df_2017_G_by_year$Post_18))
score_post19_2017_G <- as.numeric(as.character(df_2017_G_by_year$Post_19))
score_post20_2017_G <- as.numeric(as.character(df_2017_G_by_year$Post_20))
score_post21_2017_G <- as.numeric(as.character(df_2017_G_by_year$Post_21))
score_post22_2017_G <- as.numeric(as.character(df_2017_G_by_year$Post_22))

score_post1_2017_NG <- as.numeric(as.character(df_2017_NG_by_year$Post_1))
score_post2_2017_NG <- as.numeric(as.character(df_2017_NG_by_year$Post_2))
score_post3_2017_NG <- as.numeric(as.character(df_2017_NG_by_year$Post_3))
score_post4_2017_NG <- as.numeric(as.character(df_2017_NG_by_year$Post_4))
score_post5_2017_NG <- as.numeric(as.character(df_2017_NG_by_year$Post_5))
score_post6_2017_NG <- as.numeric(as.character(df_2017_NG_by_year$Post_6))
score_post7_2017_NG <- as.numeric(as.character(df_2017_NG_by_year$Post_7))
score_post8_2017_NG <- as.numeric(as.character(df_2017_NG_by_year$Post_8))
score_post9_2017_NG <- as.numeric(as.character(df_2017_NG_by_year$Post_9))
score_post10_2017_NG <- as.numeric(as.character(df_2017_NG_by_year$Post_10))
score_post11_2017_NG <- as.numeric(as.character(df_2017_NG_by_year$Post_11))
score_post12_2017_NG <- as.numeric(as.character(df_2017_NG_by_year$Post_12))
score_post13_2017_NG <- as.numeric(as.character(df_2017_NG_by_year$Post_13))
score_post14_2017_NG <- as.numeric(as.character(df_2017_NG_by_year$Post_14))
score_post15_2017_NG <- as.numeric(as.character(df_2017_NG_by_year$Post_15))
score_post16_2017_NG <- as.numeric(as.character(df_2017_NG_by_year$Post_16))
score_post17_2017_NG <- as.numeric(as.character(df_2017_NG_by_year$Post_17))
score_post18_2017_NG <- as.numeric(as.character(df_2017_NG_by_year$Post_18))
score_post19_2017_NG <- as.numeric(as.character(df_2017_NG_by_year$Post_19))
score_post20_2017_NG <- as.numeric(as.character(df_2017_NG_by_year$Post_20))
score_post21_2017_NG <- as.numeric(as.character(df_2017_NG_by_year$Post_21))
score_post22_2017_NG <- as.numeric(as.character(df_2017_NG_by_year$Post_22))

#Gets score for each question
score_post1_2017_G_val <- sum(score_post1_2017_G)/length(score_post1_2017_G)
score_post2_2017_G_val <- sum(score_post2_2017_G)/length(score_post2_2017_G)
score_post3_2017_G_val <- sum(score_post3_2017_G)/length(score_post3_2017_G)
score_post4_2017_G_val <- sum(score_post4_2017_G)/length(score_post4_2017_G)
score_post5_2017_G_val <- sum(score_post5_2017_G)/length(score_post5_2017_G)
score_post6_2017_G_val <- sum(score_post6_2017_G)/length(score_post6_2017_G)
score_post7_2017_G_val <- sum(score_post7_2017_G)/length(score_post7_2017_G)
score_post8_2017_G_val <- sum(score_post8_2017_G)/length(score_post8_2017_G)
score_post9_2017_G_val <- sum(score_post9_2017_G)/length(score_post9_2017_G)
score_post10_2017_G_val <- sum(score_post10_2017_G)/length(score_post10_2017_G)
score_post11_2017_G_val <- sum(score_post11_2017_G)/length(score_post11_2017_G)
score_post12_2017_G_val <- sum(score_post12_2017_G)/length(score_post12_2017_G)
score_post13_2017_G_val <- sum(score_post13_2017_G)/length(score_post13_2017_G)
score_post14_2017_G_val <- sum(score_post14_2017_G)/length(score_post14_2017_G)
score_post15_2017_G_val <- sum(score_post15_2017_G)/length(score_post15_2017_G)
score_post16_2017_G_val <- sum(score_post16_2017_G)/length(score_post16_2017_G)
score_post17_2017_G_val <- sum(score_post17_2017_G)/length(score_post17_2017_G)
score_post18_2017_G_val <- sum(score_post18_2017_G)/length(score_post18_2017_G)
score_post19_2017_G_val <- sum(score_post19_2017_G)/length(score_post19_2017_G)
score_post20_2017_G_val <- sum(score_post20_2017_G)/length(score_post20_2017_G)
score_post21_2017_G_val <- sum(score_post21_2017_G)/length(score_post21_2017_G)
score_post22_2017_G_val <- sum(score_post22_2017_G)/length(score_post22_2017_G)

score_post1_2017_NG_val <- sum(score_post1_2017_NG)/length(score_post1_2017_NG)
score_post2_2017_NG_val <- sum(score_post2_2017_NG)/length(score_post2_2017_NG)
score_post3_2017_NG_val <- sum(score_post3_2017_NG)/length(score_post3_2017_NG)
score_post4_2017_NG_val <- sum(score_post4_2017_NG)/length(score_post4_2017_NG)
score_post5_2017_NG_val <- sum(score_post5_2017_NG)/length(score_post5_2017_NG)
score_post6_2017_NG_val <- sum(score_post6_2017_NG)/length(score_post6_2017_NG)
score_post7_2017_NG_val <- sum(score_post7_2017_NG)/length(score_post7_2017_NG)
score_post8_2017_NG_val <- sum(score_post8_2017_NG)/length(score_post8_2017_NG)
score_post9_2017_NG_val <- sum(score_post9_2017_NG)/length(score_post9_2017_NG)
score_post10_2017_NG_val <- sum(score_post10_2017_NG)/length(score_post10_2017_NG)
score_post11_2017_NG_val <- sum(score_post11_2017_NG)/length(score_post11_2017_NG)
score_post12_2017_NG_val <- sum(score_post12_2017_NG)/length(score_post12_2017_NG)
score_post13_2017_NG_val <- sum(score_post13_2017_NG)/length(score_post13_2017_NG)
score_post14_2017_NG_val <- sum(score_post14_2017_NG)/length(score_post14_2017_NG)
score_post15_2017_NG_val <- sum(score_post15_2017_NG)/length(score_post15_2017_NG)
score_post16_2017_NG_val <- sum(score_post16_2017_NG)/length(score_post16_2017_NG)
score_post17_2017_NG_val <- sum(score_post17_2017_NG)/length(score_post17_2017_NG)
score_post18_2017_NG_val <- sum(score_post18_2017_NG)/length(score_post18_2017_NG)
score_post19_2017_NG_val <- sum(score_post19_2017_NG)/length(score_post19_2017_NG)
score_post20_2017_NG_val <- sum(score_post20_2017_NG)/length(score_post20_2017_NG)
score_post21_2017_NG_val <- sum(score_post21_2017_NG)/length(score_post21_2017_NG)
score_post22_2017_NG_val <- sum(score_post22_2017_NG)/length(score_post22_2017_NG)


#Vector of pre-recitation and post-recitation scores by question on 2017 genie classes
pre_recitation_scores_2017_G2AT3 <- c(score_pre1_2017_G_val,
                                      score_pre3_2017_G_val,
                                      score_pre15_2017_G_val,
                                      score_pre4_2017_G_val,
                                      score_pre10_2017_G_val,
                                      score_pre13_2017_G_val,
                                      score_pre16_2017_G_val,
                                      score_pre7_2017_G_val,
                                      score_pre5_2017_G_val,
                                      score_pre6_2017_G_val,
                                      score_pre8_2017_G_val,
                                      score_pre2_2017_G_val,
                                      score_pre9_2017_G_val,
                                      score_pre12_2017_G_val,
                                      score_pre17_2017_G_val,
                                      score_pre20_2017_G_val,
                                      score_pre14_2017_G_val,
                                      score_pre19_2017_G_val,
                                      score_pre22_2017_G_val,
                                      score_pre11_2017_G_val,
                                      score_pre18_2017_G_val,
                                      score_pre21_2017_G_val)


post_recitation_scores_2017_G2AT3 <- c(score_post1_2017_G_val,
                                       score_post3_2017_G_val,
                                       score_post15_2017_G_val,
                                       score_post4_2017_G_val,
                                       score_post10_2017_G_val,
                                       score_post13_2017_G_val,
                                       score_post16_2017_G_val,
                                       score_post7_2017_G_val,
                                       score_post5_2017_G_val,
                                       score_post6_2017_G_val,
                                       score_post8_2017_G_val,
                                       score_post2_2017_G_val,
                                       score_post9_2017_G_val,
                                       score_post12_2017_G_val,
                                       score_post17_2017_G_val,
                                       score_post20_2017_G_val,
                                       score_post14_2017_G_val,
                                       score_post19_2017_G_val,
                                       score_post22_2017_G_val,
                                       score_post11_2017_G_val,
                                       score_post18_2017_G_val,
                                       score_post21_2017_G_val)


pre_recitation_scores_2017_NG2AT3 <- c(score_pre1_2017_NG_val,
                                       score_pre3_2017_NG_val,
                                       score_pre15_2017_NG_val,
                                       score_pre4_2017_NG_val,
                                       score_pre10_2017_NG_val,
                                       score_pre13_2017_NG_val,
                                       score_pre16_2017_NG_val,
                                       score_pre7_2017_NG_val,
                                       score_pre5_2017_NG_val,
                                       score_pre6_2017_NG_val,
                                       score_pre8_2017_NG_val,
                                       score_pre2_2017_NG_val,
                                       score_pre9_2017_NG_val,
                                       score_pre12_2017_NG_val,
                                       score_pre17_2017_NG_val,
                                       score_pre20_2017_NG_val,
                                       score_pre14_2017_NG_val,
                                       score_pre19_2017_NG_val,
                                       score_pre22_2017_NG_val,
                                       score_pre11_2017_NG_val,
                                       score_pre18_2017_NG_val,
                                       score_pre21_2017_NG_val)


post_recitation_scores_2017_NG2AT3 <- c(score_post1_2017_NG_val,
                                        score_post3_2017_NG_val,
                                        score_post15_2017_NG_val,
                                        score_post4_2017_NG_val,
                                        score_post10_2017_NG_val,
                                        score_post13_2017_NG_val,
                                        score_post16_2017_NG_val,
                                        score_post7_2017_NG_val,
                                        score_post5_2017_NG_val,
                                        score_post6_2017_NG_val,
                                        score_post8_2017_NG_val,
                                        score_post2_2017_NG_val,
                                        score_post9_2017_NG_val,
                                        score_post12_2017_NG_val,
                                        score_post17_2017_NG_val,
                                        score_post20_2017_NG_val,
                                        score_post14_2017_NG_val,
                                        score_post19_2017_NG_val,
                                        score_post22_2017_NG_val,
                                        score_post11_2017_NG_val,
                                        score_post18_2017_NG_val,
                                        score_post21_2017_NG_val)


#get diifferece between pre- and post-recitation scores
score_diff1_2017_G <- score_post1_2017_G_val-score_pre1_2017_G_val
score_diff2_2017_G <- score_post2_2017_G_val-score_pre2_2017_G_val
score_diff3_2017_G <- score_post3_2017_G_val-score_pre3_2017_G_val
score_diff4_2017_G <- score_post4_2017_G_val-score_pre4_2017_G_val
score_diff5_2017_G <- score_post5_2017_G_val-score_pre5_2017_G_val
score_diff6_2017_G <- score_post6_2017_G_val-score_pre6_2017_G_val
score_diff7_2017_G <- score_post7_2017_G_val-score_pre7_2017_G_val
score_diff8_2017_G <- score_post8_2017_G_val-score_pre8_2017_G_val
score_diff9_2017_G <- score_post9_2017_G_val-score_pre9_2017_G_val
score_diff10_2017_G <- score_post10_2017_G_val-score_pre10_2017_G_val
score_diff11_2017_G <- score_post11_2017_G_val-score_pre11_2017_G_val
score_diff12_2017_G <- score_post12_2017_G_val-score_pre12_2017_G_val
score_diff13_2017_G <- score_post13_2017_G_val-score_pre13_2017_G_val
score_diff14_2017_G <- score_post14_2017_G_val-score_pre14_2017_G_val
score_diff15_2017_G <- score_post15_2017_G_val-score_pre15_2017_G_val
score_diff16_2017_G <- score_post16_2017_G_val-score_pre16_2017_G_val
score_diff17_2017_G <- score_post17_2017_G_val-score_pre17_2017_G_val
score_diff18_2017_G <- score_post18_2017_G_val-score_pre18_2017_G_val
score_diff19_2017_G <- score_post19_2017_G_val-score_pre19_2017_G_val
score_diff20_2017_G <- score_post20_2017_G_val-score_pre20_2017_G_val
score_diff21_2017_G <- score_post21_2017_G_val-score_pre21_2017_G_val
score_diff22_2017_G <- score_post22_2017_G_val-score_pre22_2017_G_val


diff_recitation_scores_2017_G2AT3 <- c(score_diff1_2017_G,
                                   score_diff3_2017_G,
                                   score_diff4_2017_G,
                                   score_diff10_2017_G,
                                   score_diff13_2017_G,
                                   score_diff15_2017_G,
                                   score_diff16_2017_G,
                                   score_diff7_2017_G,
                                   score_diff5_2017_G,
                                   score_diff6_2017_G,
                                   score_diff8_2017_G,
                                   score_diff2_2017_G,
                                   score_diff9_2017_G,
                                   score_diff12_2017_G,
                                   score_diff17_2017_G,
                                   score_diff20_2017_G,
                                   score_diff14_2017_G,
                                   score_diff19_2017_G,
                                   score_diff22_2017_G,
                                   score_diff11_2017_G,
                                   score_diff18_2017_G,
                                   score_diff21_2017_G)

score_diff1_2017_NG <- score_post1_2017_NG_val-score_pre1_2017_NG_val
score_diff2_2017_NG <- score_post2_2017_NG_val-score_pre2_2017_NG_val
score_diff3_2017_NG <- score_post3_2017_NG_val-score_pre3_2017_NG_val
score_diff4_2017_NG <- score_post4_2017_NG_val-score_pre4_2017_NG_val
score_diff5_2017_NG <- score_post5_2017_NG_val-score_pre5_2017_NG_val
score_diff6_2017_NG <- score_post6_2017_NG_val-score_pre6_2017_NG_val
score_diff7_2017_NG <- score_post7_2017_NG_val-score_pre7_2017_NG_val
score_diff8_2017_NG <- score_post8_2017_NG_val-score_pre8_2017_NG_val
score_diff9_2017_NG <- score_post9_2017_NG_val-score_pre9_2017_NG_val
score_diff10_2017_NG <- score_post10_2017_NG_val-score_pre10_2017_NG_val
score_diff11_2017_NG <- score_post11_2017_NG_val-score_pre11_2017_NG_val
score_diff12_2017_NG <- score_post12_2017_NG_val-score_pre12_2017_NG_val
score_diff13_2017_NG <- score_post13_2017_NG_val-score_pre13_2017_NG_val
score_diff14_2017_NG <- score_post14_2017_NG_val-score_pre14_2017_NG_val
score_diff15_2017_NG <- score_post15_2017_NG_val-score_pre15_2017_NG_val
score_diff16_2017_NG <- score_post16_2017_NG_val-score_pre16_2017_NG_val
score_diff17_2017_NG <- score_post17_2017_NG_val-score_pre17_2017_NG_val
score_diff18_2017_NG <- score_post18_2017_NG_val-score_pre18_2017_NG_val
score_diff19_2017_NG <- score_post19_2017_NG_val-score_pre19_2017_NG_val
score_diff20_2017_NG <- score_post20_2017_NG_val-score_pre20_2017_NG_val
score_diff21_2017_NG <- score_post21_2017_NG_val-score_pre21_2017_NG_val
score_diff22_2017_NG <- score_post22_2017_NG_val-score_pre22_2017_NG_val

diff_recitation_scores_2017_NG2AT3 <- c(score_diff1_2017_NG,
                                    score_diff3_2017_NG,
                                    score_diff4_2017_NG,
                                    score_diff10_2017_NG,
                                    score_diff13_2017_NG,
                                    score_diff15_2017_NG,
                                    score_diff16_2017_NG,
                                    score_diff7_2017_NG,
                                    score_diff5_2017_NG,
                                    score_diff6_2017_NG,
                                    score_diff8_2017_NG,
                                    score_diff2_2017_NG,
                                    score_diff9_2017_NG,
                                    score_diff12_2017_NG,
                                    score_diff17_2017_NG,
                                    score_diff20_2017_NG,
                                    score_diff14_2017_NG,
                                    score_diff19_2017_NG,
                                    score_diff22_2017_NG,
                                    score_diff11_2017_NG,
                                    score_diff18_2017_NG,
                                    score_diff21_2017_NG)
                                                       

#Questions on 2AT3 order in Price et al 2014
question2AT3 <- c("Q1","Q3","Q15","Q4","Q10","Q13","Q16","Q7","Q5","Q6","Q8","Q2","Q9","Q12","Q17","Q20","Q14","Q19","Q22","Q11","Q18","Q21")
time_diffG <- rep("Diff-score Genie", 22)
time_diffNG <- rep("Diff-score no Genie", 22)
df_diff_scores_by_question_GA2T3 <- data.frame(diff_recitation_scores = diff_recitation_scores_2017_G2AT3,
                                           question=question2AT3,
                                           time=time_diffG)

df_diff_scores_by_question_NGA2T3 <- data.frame(diff_recitation_scores = diff_recitation_scores_2017_NG2AT3,
                                            question=question2AT3,
                                            time=time_diffNG)

df_diff_scores_by_question_GA2T3$question <- factor(df_diff_scores_by_question_GA2T3$question,
                                                levels = df_diff_scores_by_question_GA2T3$question)

df_diff_scores_by_question_NGA2T3$question <- factor(df_diff_scores_by_question_NGA2T3$question,
                                                 levels = df_diff_scores_by_question_NGA2T3$question)

df_diff_scores_by_question_combinedA2T3 <- rbind(df_diff_scores_by_question_GA2T3, df_diff_scores_by_question_NGA2T3)

pdf(file="F3.pdf")

my_purple_colors <- c("orchid4","plum")
diff_per_question_plotA2T3 <- ggplot(data=df_diff_scores_by_question_combinedA2T3, aes(x=question, y=diff_recitation_scores, fill=time)) +
  geom_bar(width=0.4, stat="identity", position=position_dodge(0.5)) +
  scale_fill_manual(values = my_purple_colors) +
  xlab("Question") +
  ylab("Scores") +
  labs(fill = "Recitation") +
  scale_x_discrete(limits= df_diff_scores_by_question_combinedA2T3$p.question) +
  theme(panel.grid.major = element_blank(), panel.grid.minor = element_blank(),
          panel.background = element_blank(), axis.line = element_line(colour = "black"))

print(diff_per_question_plotA2T3)
dev.off()


question2AT3 <- c("Q1","Q3","Q15","Q4","Q10","Q13","Q16","Q7","Q5","Q6","Q8","Q2","Q9","Q12","Q17","Q20","Q14","Q19","Q22","Q11","Q18","Q21")
time_postG <- rep("Post-score Genie", 22)
time_postNG <- rep("Post-score no Genie", 22)
df_post_scores_by_question_GA2T3 <- data.frame(post_recitation_scores = post_recitation_scores_2017_G2AT3,
                                           question=question2AT3,
                                           time=time_postG)

df_post_scores_by_question_NGA2T3 <- data.frame(post_recitation_scores = post_recitation_scores_2017_NG2AT3,
                                            question=question2AT3,
                                            time=time_postNG)


df_post_scores_by_question_GA2T3$question <- factor(df_post_scores_by_question_GA2T3$question,
                                                levels = df_post_scores_by_question_GA2T3$question)

df_post_scores_by_question_NGA2T3$question <- factor(df_post_scores_by_question_NGA2T3$question,
                                                 levels = df_post_scores_by_question_NGA2T3$question)

df_post_scores_by_question_combinedA2T3 <- rbind(df_post_scores_by_question_GA2T3, df_post_scores_by_question_NGA2T3)


pdf(file="F2.pdf")

my_green_colors <- c("darkgreen","darkseagreen3")
post_per_question_plotA2T3 <- ggplot(data=df_post_scores_by_question_combinedA2T3, aes(x=question, y=post_recitation_scores, fill=time)) +
  geom_bar(width=0.4, stat="identity", position=position_dodge(0.5)) +
  #geom_text(aes(label=combined_diff_2017), vjust=1.6, color="red",
  #          position = position_dodge(0.9), size=3.5)+
  scale_fill_manual(values = my_green_colors) +
  xlab("Question") +
  ylab("Scores") +
  labs(fill = "Recitation") +
  scale_x_discrete(limits= df_post_scores_by_question_combinedA2T3$p.question)+
  theme(panel.grid.major = element_blank(), panel.grid.minor = element_blank(),
        panel.background = element_blank(), axis.line = element_line(colour = "black"))

print(post_per_question_plotA2T3)
dev.off()

#########################################################################################
#########################################################################################
#########################################################################################
#########################################################################################
#########################################################################################
#ANALYSIS REMOVING HONOR SECTIONS

#The results for both years and treatments removing the honors recitation section on each year
combined_years_without_honors <- combined_years[!(combined_years$class=="Pair1_730" & combined_years$year=="2016_Genie"),]
combined_years_without_honors <- combined_years_without_honors[!(combined_years_without_honors$class=="Pair2_130" & combined_years_without_honors$year=="2017_Genie"),]
head(combined_years_without_honors)

#Creates a violin plot of the difference in scores for each year and treatment
plotdiff <- ggplot(combined_years_without_honors, aes(x = year, y = diff, fill=year)) +
  scale_y_continuous(limits = c(0, 1), breaks = seq(0, 1, by = 0.1)) +
  scale_x_discrete() + xlab("Treatment Group") +
  ylab("Difference in recitation scores") + 
  theme(legend.position = "none") +
  scale_fill_brewer(palette="Paired") + 
  geom_violin(trim=FALSE) +  
  geom_jitter(shape=16, position=position_jitter(0.1), col="black")

plotdiff <- plotdiff + theme(panel.grid.major = element_blank(), panel.grid.minor = element_blank(),
                             panel.background = element_blank(), axis.line = element_line(colour = "black"))
plotdiff


############################################################################################
#Splits the data frame into years and treatments
split_years <- split(combined_years_without_honors, combined_years_without_honors$year)
df_2016_without_honors <- split_years[[1]]
df_2017_G_without_honors <- split_years[[2]]
df_2017_NG_without_honors <- split_years[[3]]

#Fitting the data to a distribution
descdist(df_2016$score_pre, discrete = F) #beta distributionn
descdist(df_2016$score_post, discrete = F) #beta distribution
fit.beta_pre_2016 <- fitdist(df_2016_without_honors$score_pre, "beta", method = "mme")
fit.beta_post_2016 <- fitdist(df_2016_without_honors$score_post, "beta", method = "mme")
plot(fit.beta_pre_2016)
plot(fit.beta_post_2016)

descdist(df_2017_G$score_pre, discrete = F) #beta distributionn
descdist(df_2017_G$score_post, discrete = F) #beta distribution
fit.beta_pre_2017_G <- fitdist(df_2017_G_without_honors$score_pre, "beta", method = "mme")
fit.beta_post_2017_G <- fitdist(df_2017_G_without_honors$score_post, "beta", method = "mme")
plot(fit.beta_pre_2017_G)
plot(fit.beta_post_2017_G)

descdist(df_2017_NG$score_pre, discrete = F) #beta distributionn
descdist(df_2017_NG$score_post, discrete = F) #beta distribution
fit.beta_pre_2017_NG <- fitdist(df_2017_NG_without_honors$score_pre, "beta", method = "mme")
fit.beta_post_2017_NG <- fitdist(df_2017_NG_without_honors$score_post, "beta", method = "mme")
plot(fit.beta_pre_2017_NG)
plot(fit.beta_post_2017_NG)


######Beta regression models#######
#Function to transform y values to be used on a betareg distribution
y.transf.betareg <- function(y){
  n.obs <- sum(!is.na(y))
  (y * (n.obs - 1) + 0.5) / n.obs
}

#Are the pre-recitation scores different across years (use of Genie or not)?
effect_combined_years_without_honors_pre <- betareg(y.transf.betareg(score_pre) ~  year, data=combined_years_without_honors, link = "logit")
#Are the post-recitation scores across years dependent of the pre-recitation scores and/or the year of instruction (use of Genie or not)?
effect_combined_years_without_honors <- betareg(y.transf.betareg(score_post) ~ score_pre + year, data=combined_years_without_honors, link = "logit")
#Are the post-recitation scores on 2016 dependent of the pre-recitation scores and/or the class section?
effect_test_2016_without_honors <- betareg(y.transf.betareg(score_post) ~ score_pre + class, data=df_2016_without_honors, link = "logit")
#Are the post-recitation scores on 2017 dependent of the pre-recitation scores and/or the class section when using Genie?
effect_test_2017_G_without_honors <- betareg(y.transf.betareg(score_post) ~ score_pre + class, data=df_2017_G_without_honors, link = "logit")
#Are the post-recitation scores on 2017 dependent of the pre-recitation scores and/or the class section when not using Genie?
effect_test_2017_NG_without_honors <- betareg(y.transf.betareg(score_post) ~ score_pre + class, data=df_2017_NG_without_honors, link = "logit")


#Writing output to text
sink('nohonors_betareg_output.txt', append=TRUE)
cat("Betareg on pre-recitation scores across years nohonors\n")
summary(effect_combined_years_without_honors_pre)
cat("\n\n")
cat("=============================\n")
cat("Betareg on pre-recitation scores across years nohonors\n")
summary(effect_combined_years_without_honors)
cat("\n\n")
cat("=============================\n")
cat("Betareg on postrecitation scores 2016 nohonors\n")
summary(effect_test_2016_without_honors)
cat("\n\n")
cat("=============================\n")
cat("Betareg on postrecitation scores 2017 Genie nohonors\n")
summary(effect_test_2017_G_without_honors)
cat("\n\n")
cat("=============================\n")
cat("Betareg on postrecitation scores 2017 Non-genie nohonors\n")
summary(effect_test_2017_NG_without_honors)
sink()

############################################################################################
#Size effect testing
#Transforms the scores columns on each data frame into a numeric vector
score_post_2016_without_honors <- as.numeric(as.character(df_2016_without_honors$score_post))
score_pre_2016_without_honors <- as.numeric(as.character(df_2016_without_honors$score_pre))
score_diff_2016_without_honors <- as.numeric(as.character(df_2016_without_honors$diff))

score_post_2017_G_without_honors <- as.numeric(as.character(df_2017_G_without_honors$score_post))
score_pre_2017_G_without_honors <- as.numeric(as.character(df_2017_G_without_honors$score_pre))
score_diff_2017_G_without_honors <- as.numeric(as.character(df_2017_G_without_honors$diff))

score_post_2017_NG_without_honors <- as.numeric(as.character(df_2017_NG_without_honors$score_post))
score_pre_2017_NG_without_honors <- as.numeric(as.character(df_2017_NG_without_honors$score_pre))
score_diff_2017_NG_without_honors <- as.numeric(as.character(df_2017_NG_without_honors$diff))


#Are the scores different before and after instruction on 2016 (Genie)? 
cohen.d(score_post_2016_without_honors,score_pre_2016_without_honors)
#Are the scores different before and after instruction on 2017 (Genie)? 
cohen.d(score_post_2017_G_without_honors,score_pre_2017_G_without_honors)
#Are the scores different before and after instruction on 2017 (No Genie)? 
cohen.d(score_post_2017_NG_without_honors,score_pre_2017_NG_without_honors)
#Are the pre-recitation scores different between 2017's Genie and Non Genie classes? 
cohen.d(score_pre_2017_G_without_honors,score_pre_2017_NG_without_honors)
#Are the post-recitation scores different between 2017's Genie and Non Genie classes? 
cohen.d(score_post_2017_G_without_honors,score_post_2017_NG_without_honors)
#Are the difference in pre- and post-recitation scores different between 2017's Genie and Non Genie classes? 
cohen.d(score_diff_2017_G_without_honors,score_diff_2017_NG_without_honors)


#Writing output to text
sink('nohonors_cohenD_output.txt', append=TRUE)
cat("Cohen's d for pre- vs. post-recitation 2016 nohonors\n")
cohen.d(score_post_2016_without_honors,score_pre_2016_without_honors)
cat("=============================\n")
cat("Cohen's d for pre- vs. post-recitation 2017 Genie nohonors\n")
cohen.d(score_post_2017_G_without_honors,score_pre_2017_G_without_honors)
cat("=============================\n")
cat("Cohen's d for pre- vs. post-recitation 2017 Non-genie nohonors\n")
cohen.d(score_post_2017_NG_without_honors,score_pre_2017_NG_without_honors)
cat("=============================\n")
cat("Cohen's d for pre-recitation 2017 Genie vs. Non-genie nohonors\n")
cohen.d(score_pre_2017_G_without_honors,score_pre_2017_NG_without_honors)
cat("=============================\n")
cat("Cohen's d for post-recitation 2017 Genie vs. Non-genie nohonors\n")
cohen.d(score_post_2017_G_without_honors,score_post_2017_NG_without_honors)
cat("=============================\n")
cat("Cohen's d for diff between pre- and post-recitation 2017 Genie vs. Non-genie nohonors\n")
cohen.d(score_diff_2017_G_without_honors,score_diff_2017_NG_without_honors)
sink()


############################################################################################
#Paired Student t-test of pre- vs post-recitation performance
#2016
t.test(score_pre_2016_without_honors, score_post_2016_without_honors, paired = TRUE, p.adj = "bonf")
#2017G
t.test(score_pre_2017_G_without_honors, score_post_2017_G_without_honors, paired = TRUE, p.adj = "bonf")
#2017NG
t.test(score_pre_2017_NG_without_honors, score_post_2017_NG_without_honors, paired = TRUE, p.adj = "bonf")

#Writing output to text
sink('nohonors_paired_t_test.txt', append=TRUE)
cat("Paired Student t-test of pre- vs post-recitation performance in 2016 nohonors\n")
t.test(score_pre_2016_without_honors, score_post_2016_without_honors, paired = TRUE, p.adj = "bonf")
cat("=============================\n")
cat("Paired Student t-test of pre- vs post-recitation performance in 2017 Genie nohonors\n")
t.test(score_pre_2017_G_without_honors, score_post_2017_G_without_honors, paired = TRUE, p.adj = "bonf")
cat("=============================\n")
cat("Paired Student t-test of pre- vs post-recitation performance in 2017 Non-genie nohonors\n")
t.test(score_pre_2017_NG_without_honors, score_post_2017_NG_without_honors, paired = TRUE, p.adj = "bonf")
sink()

############################################################################################
#Visualization of performance on each year via violin plots
VIOLINPLOT_2016_PRE_POST <- read.table("Sfile11_VIOLINPLOT_2016_PRE_POST.txt", header = TRUE, sep = "\t")
head(VIOLINPLOT_2016_PRE_POST)
VIOLINPLOT_2016_PRE_POST_without_honors <- VIOLINPLOT_2016_PRE_POST[!(VIOLINPLOT_2016_PRE_POST$class=="Pair1_730"),]
head(VIOLINPLOT_2016_PRE_POST_without_honors)

VIOLINPLOT_2017_GENIE_PRE_POST <- read.table("Sfile12_VIOLINPLOT_2017_GENIE_PRE_POST.txt", header = TRUE, sep = "\t")
head(VIOLINPLOT_2017_GENIE_PRE_POST)
VIOLINPLOT_2017_GENIE_PRE_POST_without_honors <- VIOLINPLOT_2017_GENIE_PRE_POST[!(VIOLINPLOT_2017_GENIE_PRE_POST$class=="Pair2_130"),]
head(VIOLINPLOT_2017_GENIE_PRE_POST_without_honors)

VIOLINPLOT_2017_NOGENIE_PRE_POST <- read.table("Sfile13_VIOLINPLOT_2017_NOGENIE_PRE_POST.txt", header = TRUE, sep = "\t")
head(VIOLINPLOT_2017_NOGENIE_PRE_POST)

require(gridExtra)
VIOLINPLOT_2016_without_honors <- ggplot(VIOLINPLOT_2016_PRE_POST_without_honors, aes(x = year, y = score, fill=year)) +
  scale_y_continuous(limits = c(0, 1.1), breaks = seq(0, 1.1, by = 0.1)) +
  scale_x_discrete() + xlab("") +
  ylab("2016") +
  theme(legend.position = "none") +
  scale_fill_brewer(palette="Dark2") + 
  geom_violin(trim=FALSE) + 
  geom_jitter(shape=16, position=position_jitter(0.1), col="black")

VIOLINPLOT_2016_without_honors <- VIOLINPLOT_2016_without_honors + theme(panel.grid.major = element_blank(), panel.grid.minor = element_blank(),
                                                                         panel.background = element_blank(), axis.line = element_line(colour = "black"))

VIOLINPLOT_2017_GENIE_without_honors <- ggplot(VIOLINPLOT_2017_GENIE_PRE_POST_without_honors, aes(x = year, y = score, fill=year)) +
  scale_y_continuous(limits = c(0, 1.1), breaks = seq(0, 1.1, by = 0.1)) +
  scale_x_discrete() + xlab("") +
  ylab("Evaluation scores 2017 (Genie)") +
  theme(legend.position = "none") +
  scale_fill_brewer(palette="Dark2") + 
  geom_violin(trim=FALSE) + 
  geom_jitter(shape=16, position=position_jitter(0.1), col="black")

VIOLINPLOT_2017_GENIE_without_honors <- VIOLINPLOT_2017_GENIE_without_honors + theme(panel.grid.major = element_blank(), panel.grid.minor = element_blank(),
                                                                                     panel.background = element_blank(), axis.line = element_line(colour = "black"))

VIOLINPLOT_2017_NOGENIE <- ggplot(VIOLINPLOT_2017_NOGENIE_PRE_POST, aes(x = year, y = score, fill=year)) +
  scale_y_continuous(limits = c(0, 1.1), breaks = seq(0, 1.1, by = 0.1)) +
  scale_x_discrete() + xlab("") +
  ylab("2017 (No Genie)") +
  theme(legend.position = "none") +
  scale_fill_brewer(palette="Dark2") + 
  geom_violin(trim=FALSE) + 
  geom_jitter(shape=16, position=position_jitter(0.1), col="black")


VIOLINPLOT_2017_NOGENIE <- VIOLINPLOT_2017_NOGENIE + theme(panel.grid.major = element_blank(), panel.grid.minor = element_blank(),
                                                           panel.background = element_blank(), axis.line = element_line(colour = "black"))


#Paired student plot
pd <- position_dodge(0.01)

PAIRED_STUDENT_2016_without_honors <- ggplot(VIOLINPLOT_2016_PRE_POST_without_honors, aes(x = year, y = score)) +
  scale_y_continuous(limits = c(0, 1.1), breaks = seq(0, 1.1, by = 0.1)) +
  scale_x_discrete(labels=c(".Pre-recitation_score_2016" = "Pre-recitation", "Post-recitation_score_2016" = "Post-recitation")) + xlab("") +
  labs(title="Genie 2016", y ="Scores")+
  theme_bw() + 
  theme(panel.border = element_blank(), panel.grid.major = element_blank(), panel.grid.minor = element_blank(), axis.line = element_line(colour = "black")) +
  theme(legend.position = "none") +
  geom_line(aes(group = student, color=student), position = pd) +
  geom_point(position = pd)

PAIRED_STUDENT_2017_GENIE_without_honors <- ggplot(VIOLINPLOT_2017_GENIE_PRE_POST_without_honors, aes(x = year, y = score)) +
  scale_y_continuous(limits = c(0, 1.1), breaks = seq(0, 1.1, by = 0.1)) +
  scale_x_discrete(labels=c(".Pre-recitation_score_2017" = "Pre-recitation", "Post-recitation_score_2017" = "Post-recitation")) + xlab("") +
  labs(title="Genie 2017", y ="")+
  theme_bw() + 
  theme(panel.border = element_blank(), panel.grid.major = element_blank(), panel.grid.minor = element_blank(), axis.line = element_line(colour = "black")) +
  theme(legend.position = "none") +
  geom_line(aes(group = student, color=student), position = pd) +
  geom_point(position = pd)

PAIRED_STUDENT_2017_NOGENIE <- ggplot(VIOLINPLOT_2017_NOGENIE_PRE_POST, aes(x = year, y = score)) +
  scale_y_continuous(limits = c(0, 1.1), breaks = seq(0, 1.1, by = 0.1)) +
  scale_x_discrete(labels=c(".Pre-recitation_score_2017" = "Pre-recitation", "Post-recitation_score_2017" = "Post-recitation")) + xlab("") +
  labs(title="Non-Genie 2017", y ="") +
  theme_bw() + 
  theme(panel.border = element_blank(), panel.grid.major = element_blank(), panel.grid.minor = element_blank(), axis.line = element_line(colour = "black")) +
  theme(legend.position = "none") +
  geom_line(aes(group = student, color=student), position = pd) +
  geom_point(position = pd)


pdf(file="nohonors_Sfile14_violin_plots.pdf")

FS14 <- ggarrange(PAIRED_STUDENT_2016_without_honors, PAIRED_STUDENT_2017_GENIE_without_honors, PAIRED_STUDENT_2017_NOGENIE, ncol=3)

print(FS14)
dev.off()


############################################################################################
#Performance by question
compiled_years_by_question <- read.table("Sfile10_RESULTS_COMPILED_BY_QUESTION.txt", header = TRUE, sep = "\t")
head(compiled_years_by_question)

#The results for both years and treatments removing the honors recitation section on each year
compiled_years_by_question_without_honors <- compiled_years_by_question[!(compiled_years_by_question$class=="Pair1_730" & compiled_years_by_question$year=="2016_Genie"),]
compiled_years_by_question_without_honors <- compiled_years_by_question_without_honors[!(compiled_years_by_question_without_honors$class=="Pair2_130" & compiled_years_by_question_without_honors$year=="2017_Genie"),]
head(compiled_years_by_question_without_honors)

split_years_by_year <- split(compiled_years_by_question_without_honors, compiled_years_by_question_without_honors$year)
df_2016_by_year_without_honors <- split_years_by_year[[1]]
head(df_2016_by_year_without_honors)
df_2017_G_by_year_without_honors <- split_years_by_year[[2]]
head(df_2017_G_by_year_without_honors)
df_2017_NG_by_year_without_honors <- split_years_by_year[[3]]
head(df_2017_NG_by_year_without_honors)

# Calculate McNemar's Test Statistic
# https://en.wikipedia.org/wiki/McNemar%27s_test
mcnemar_stat <- function(b,c) {
  (b-c)^2/(b+c)
}

# Reshape the input data so that each year-student-question has its own line.
# Each observation will have a Pre and Post Stat
dat <- compiled_years_by_question_without_honors %>% pivot_longer(!c(year,class,student)) %>%
  separate("name", c("quiz", "question"), sep="_") %>%
  mutate(question = as.integer(question)) %>%
  pivot_wider(names_from="quiz",values_from="value")

# Count for each year-question the interaction of pre and post.
# use these counts to measure McNemar's statistic and its pvalue.
dat1 <- dat %>% mutate(result = glue("ans_{Pre}_{Post}")) %>%
  count(year, question, result) %>%
  pivot_wider(names_from="result",values_from="n", values_fill=list(n=0L)) %>%
  mutate(mcnemar_stat =  mcnemar_stat(ans_1_0, ans_0_1),
         mcnemar_pvalue = pchisq(mcnemar_stat, 1L, lower.tail = FALSE))

# Save Results
write_tsv(dat1,"nohonors_mcnemar.tsv")


############################################################################################
#Comparing 2017 genie vs non-genie classes performance per question
rawdat <- read.table("Sfile10_RESULTS_COMPILED_BY_QUESTION.txt", header = TRUE, sep = "\t")
head(rawdat)

#The results for both years and treatments removing the honors recitation section on each year
compiled_years_by_question_without_honors <- rawdat[!(rawdat$class=="Pair1_730" & rawdat$year=="2016_Genie"),]
compiled_years_by_question_without_honors <- rawdat[!(rawdat$class=="Pair2_130" & rawdat$year=="2017_Genie"),]
head(compiled_years_by_question_without_honors)

dat0 <- compiled_years_by_question_without_honors %>% pivot_longer(!c(year,class,student)) %>%
  separate("name", c("quiz", "question"), sep="_") %>%
  mutate(question = as.integer(question)) %>%
  pivot_wider(names_from="quiz",values_from="value")

write_tsv(dat0,"nohonors_pre_and_post.tsv")

dat <- read_tsv("nohonors_pre_and_post.tsv")

# Compare 2017 Genie and 2017 Not Genie on pre and post
# Use Fisher's exact tests to test the association between question switching and
# type of instruction.

dat1 <- dat %>% mutate(result = str_glue("ans_{Pre}_{Post}")) %>%
  count(year, question, result) %>%
  pivot_wider(names_from="result",values_from="n", values_fill=list(n=0L)) %>%
  filter( year %in% c("2017_Genie", "2017_No_Genie"))

dat2 <- dat1 %>% select(year,question,ans_0_1,ans_1_0) %>%
  pivot_wider(names_from="year", values_from=c(ans_0_1,ans_1_0))

f <- function(a,b,c,d) {
  m <- matrix(c(a,b,c,d),nrow=2)
  v <- fisher.test(m)
  data.frame(OR.est=v$estimate, p.value=v$p.value)
}

dat3 <- dat2 %>% rowwise() %>% summarize(f(ans_0_1_2017_Genie, ans_0_1_2017_No_Genie, ans_1_0_2017_Genie, ans_1_0_2017_No_Genie))
dat4 <- bind_cols(dat2,dat3)

write_tsv(dat4,"nohonors_genie_vs_non_genie.tsv")


############################################################################################
pal_okabe_ito <- c("#E69F00", "#56B4E9", "#009E73", "#F0E442", "#0072B2", "#D55E00", "#CC79A7", "#000000")

dat <- read_tsv("pre_and_post_nohonors.tsv")
dat.A <- dat %>% mutate(result = str_glue("ans_{Pre}_{Post}")) %>%
  count(year, student, result) %>%
  pivot_wider(names_from="result",values_from="n", values_fill=list(n=0L)) %>%
  mutate(pre_acc = (ans_1_1+ans_1_0),
         post_acc = (ans_1_1+ans_0_1))
dat.B <- dat.A %>% mutate(diff = post_acc - pre_acc, diffs = sign(diff), excess = "no") %>%
  arrange(diff)

dat4 <- dat.B %>% group_by(year) %>% group_modify(function(tbl,y){
  j <- tail(1:nrow(tbl),sum(tbl$diffs))
  tbl$excess[j] <- "yes"
  tbl
})

pretty_year <- c(
  `2016_Genie` = "Genie 2016",
  `2017_Genie` = "Genie 2017",
  `2017_No_Genie` = "Non-Genie 2017"
)

ann_tbl <- tibble(pre_acc=10,post_acc=2.5,year="2017_No_Genie",excess="yes")

pdf(file="nohonors_F1.pdf")

set.seed(0x90210)
gg <- ggplot(dat4, aes(x=pre_acc,y=post_acc,color=excess)) + geom_jitter(width=0.3,height=0.3)
gg <- gg + geom_abline(slope=1,intercept=0)
gg <- gg + labs(x = "Pre-Score", y = "Post-Score")
gg <- gg + theme_minimal() + coord_fixed(xlim=c(0,22),ylim=c(0,22))
gg <- gg + facet_wrap(~year, labeller = labeller(year = pretty_year))
gg <- gg + scale_color_manual(values=pal_okabe_ito[c(8,2)])
gg <- gg + theme(legend.position = "none")
gg <- gg + geom_label(data=ann_tbl,label="        Excess\n        Improvement",hjust="left", nudge_x=-2,color="black",size=3) +
  geom_point(data=ann_tbl,size=5)

print(gg)
dev.off()

############################################################################################
#Visualization per question
#Transforms the pre-recitation scores columns on each data frame into a numeric vector
score_pre1_2017_G_without_honors <- as.numeric(as.character(df_2017_G_by_year_without_honors$Pre_1))
score_pre2_2017_G_without_honors <- as.numeric(as.character(df_2017_G_by_year_without_honors$Pre_2))
score_pre3_2017_G_without_honors <- as.numeric(as.character(df_2017_G_by_year_without_honors$Pre_3))
score_pre4_2017_G_without_honors <- as.numeric(as.character(df_2017_G_by_year_without_honors$Pre_4))
score_pre5_2017_G_without_honors <- as.numeric(as.character(df_2017_G_by_year_without_honors$Pre_5))
score_pre6_2017_G_without_honors <- as.numeric(as.character(df_2017_G_by_year_without_honors$Pre_6))
score_pre7_2017_G_without_honors <- as.numeric(as.character(df_2017_G_by_year_without_honors$Pre_7))
score_pre8_2017_G_without_honors <- as.numeric(as.character(df_2017_G_by_year_without_honors$Pre_8))
score_pre9_2017_G_without_honors <- as.numeric(as.character(df_2017_G_by_year_without_honors$Pre_9))
score_pre10_2017_G_without_honors <- as.numeric(as.character(df_2017_G_by_year_without_honors$Pre_10))
score_pre11_2017_G_without_honors <- as.numeric(as.character(df_2017_G_by_year_without_honors$Pre_11))
score_pre12_2017_G_without_honors <- as.numeric(as.character(df_2017_G_by_year_without_honors$Pre_12))
score_pre13_2017_G_without_honors <- as.numeric(as.character(df_2017_G_by_year_without_honors$Pre_13))
score_pre14_2017_G_without_honors <- as.numeric(as.character(df_2017_G_by_year_without_honors$Pre_14))
score_pre15_2017_G_without_honors <- as.numeric(as.character(df_2017_G_by_year_without_honors$Pre_15))
score_pre16_2017_G_without_honors <- as.numeric(as.character(df_2017_G_by_year_without_honors$Pre_16))
score_pre17_2017_G_without_honors <- as.numeric(as.character(df_2017_G_by_year_without_honors$Pre_17))
score_pre18_2017_G_without_honors <- as.numeric(as.character(df_2017_G_by_year_without_honors$Pre_18))
score_pre19_2017_G_without_honors <- as.numeric(as.character(df_2017_G_by_year_without_honors$Pre_19))
score_pre20_2017_G_without_honors <- as.numeric(as.character(df_2017_G_by_year_without_honors$Pre_20))
score_pre21_2017_G_without_honors <- as.numeric(as.character(df_2017_G_by_year_without_honors$Pre_21))
score_pre22_2017_G_without_honors <- as.numeric(as.character(df_2017_G_by_year_without_honors$Pre_22))

score_pre1_2017_NG_without_honors <- as.numeric(as.character(df_2017_NG_by_year_without_honors$Pre_1))
score_pre2_2017_NG_without_honors <- as.numeric(as.character(df_2017_NG_by_year_without_honors$Pre_2))
score_pre3_2017_NG_without_honors <- as.numeric(as.character(df_2017_NG_by_year_without_honors$Pre_3))
score_pre4_2017_NG_without_honors <- as.numeric(as.character(df_2017_NG_by_year_without_honors$Pre_4))
score_pre5_2017_NG_without_honors <- as.numeric(as.character(df_2017_NG_by_year_without_honors$Pre_5))
score_pre6_2017_NG_without_honors <- as.numeric(as.character(df_2017_NG_by_year_without_honors$Pre_6))
score_pre7_2017_NG_without_honors <- as.numeric(as.character(df_2017_NG_by_year_without_honors$Pre_7))
score_pre8_2017_NG_without_honors <- as.numeric(as.character(df_2017_NG_by_year_without_honors$Pre_8))
score_pre9_2017_NG_without_honors <- as.numeric(as.character(df_2017_NG_by_year_without_honors$Pre_9))
score_pre10_2017_NG_without_honors <- as.numeric(as.character(df_2017_NG_by_year_without_honors$Pre_10))
score_pre11_2017_NG_without_honors <- as.numeric(as.character(df_2017_NG_by_year_without_honors$Pre_11))
score_pre12_2017_NG_without_honors <- as.numeric(as.character(df_2017_NG_by_year_without_honors$Pre_12))
score_pre13_2017_NG_without_honors <- as.numeric(as.character(df_2017_NG_by_year_without_honors$Pre_13))
score_pre14_2017_NG_without_honors <- as.numeric(as.character(df_2017_NG_by_year_without_honors$Pre_14))
score_pre15_2017_NG_without_honors <- as.numeric(as.character(df_2017_NG_by_year_without_honors$Pre_15))
score_pre16_2017_NG_without_honors <- as.numeric(as.character(df_2017_NG_by_year_without_honors$Pre_16))
score_pre17_2017_NG_without_honors <- as.numeric(as.character(df_2017_NG_by_year_without_honors$Pre_17))
score_pre18_2017_NG_without_honors <- as.numeric(as.character(df_2017_NG_by_year_without_honors$Pre_18))
score_pre19_2017_NG_without_honors <- as.numeric(as.character(df_2017_NG_by_year_without_honors$Pre_19))
score_pre20_2017_NG_without_honors <- as.numeric(as.character(df_2017_NG_by_year_without_honors$Pre_20))
score_pre21_2017_NG_without_honors <- as.numeric(as.character(df_2017_NG_by_year_without_honors$Pre_21))
score_pre22_2017_NG_without_honors <- as.numeric(as.character(df_2017_NG_by_year_without_honors$Pre_22))

#Gets score for that question
score_pre1_2017_G_val_without_honors <- sum(score_pre1_2017_G_without_honors)/length(score_pre1_2017_G_without_honors)
score_pre2_2017_G_val_without_honors <- sum(score_pre2_2017_G_without_honors)/length(score_pre2_2017_G_without_honors)
score_pre3_2017_G_val_without_honors <- sum(score_pre3_2017_G_without_honors)/length(score_pre3_2017_G_without_honors)
score_pre4_2017_G_val_without_honors <- sum(score_pre4_2017_G_without_honors)/length(score_pre4_2017_G_without_honors)
score_pre5_2017_G_val_without_honors <- sum(score_pre5_2017_G_without_honors)/length(score_pre5_2017_G_without_honors)
score_pre6_2017_G_val_without_honors <- sum(score_pre6_2017_G_without_honors)/length(score_pre6_2017_G_without_honors)
score_pre7_2017_G_val_without_honors <- sum(score_pre7_2017_G_without_honors)/length(score_pre7_2017_G_without_honors)
score_pre8_2017_G_val_without_honors <- sum(score_pre8_2017_G_without_honors)/length(score_pre8_2017_G_without_honors)
score_pre9_2017_G_val_without_honors <- sum(score_pre9_2017_G_without_honors)/length(score_pre9_2017_G_without_honors)
score_pre10_2017_G_val_without_honors <- sum(score_pre10_2017_G_without_honors)/length(score_pre10_2017_G_without_honors)
score_pre11_2017_G_val_without_honors <- sum(score_pre11_2017_G_without_honors)/length(score_pre11_2017_G_without_honors)
score_pre12_2017_G_val_without_honors <- sum(score_pre12_2017_G_without_honors)/length(score_pre12_2017_G_without_honors)
score_pre13_2017_G_val_without_honors <- sum(score_pre13_2017_G_without_honors)/length(score_pre13_2017_G_without_honors)
score_pre14_2017_G_val_without_honors <- sum(score_pre14_2017_G_without_honors)/length(score_pre14_2017_G_without_honors)
score_pre15_2017_G_val_without_honors <- sum(score_pre15_2017_G_without_honors)/length(score_pre15_2017_G_without_honors)
score_pre16_2017_G_val_without_honors <- sum(score_pre16_2017_G_without_honors)/length(score_pre16_2017_G_without_honors)
score_pre17_2017_G_val_without_honors <- sum(score_pre17_2017_G_without_honors)/length(score_pre17_2017_G_without_honors)
score_pre18_2017_G_val_without_honors <- sum(score_pre18_2017_G_without_honors)/length(score_pre18_2017_G_without_honors)
score_pre19_2017_G_val_without_honors <- sum(score_pre19_2017_G_without_honors)/length(score_pre19_2017_G_without_honors)
score_pre20_2017_G_val_without_honors <- sum(score_pre20_2017_G_without_honors)/length(score_pre20_2017_G_without_honors)
score_pre21_2017_G_val_without_honors <- sum(score_pre21_2017_G_without_honors)/length(score_pre21_2017_G_without_honors)
score_pre22_2017_G_val_without_honors <- sum(score_pre22_2017_G_without_honors)/length(score_pre22_2017_G_without_honors)

score_pre1_2017_NG_val_without_honors <- sum(score_pre1_2017_NG_without_honors)/length(score_pre1_2017_NG_without_honors)
score_pre2_2017_NG_val_without_honors <- sum(score_pre2_2017_NG_without_honors)/length(score_pre2_2017_NG_without_honors)
score_pre3_2017_NG_val_without_honors <- sum(score_pre3_2017_NG_without_honors)/length(score_pre3_2017_NG_without_honors)
score_pre4_2017_NG_val_without_honors <- sum(score_pre4_2017_NG_without_honors)/length(score_pre4_2017_NG_without_honors)
score_pre5_2017_NG_val_without_honors <- sum(score_pre5_2017_NG_without_honors)/length(score_pre5_2017_NG_without_honors)
score_pre6_2017_NG_val_without_honors <- sum(score_pre6_2017_NG_without_honors)/length(score_pre6_2017_NG_without_honors)
score_pre7_2017_NG_val_without_honors <- sum(score_pre7_2017_NG_without_honors)/length(score_pre7_2017_NG_without_honors)
score_pre8_2017_NG_val_without_honors <- sum(score_pre8_2017_NG_without_honors)/length(score_pre8_2017_NG_without_honors)
score_pre9_2017_NG_val_without_honors <- sum(score_pre9_2017_NG_without_honors)/length(score_pre9_2017_NG_without_honors)
score_pre10_2017_NG_val_without_honors <- sum(score_pre10_2017_NG_without_honors)/length(score_pre10_2017_NG_without_honors)
score_pre11_2017_NG_val_without_honors <- sum(score_pre11_2017_NG_without_honors)/length(score_pre11_2017_NG_without_honors)
score_pre12_2017_NG_val_without_honors <- sum(score_pre12_2017_NG_without_honors)/length(score_pre12_2017_NG_without_honors)
score_pre13_2017_NG_val_without_honors <- sum(score_pre13_2017_NG_without_honors)/length(score_pre13_2017_NG_without_honors)
score_pre14_2017_NG_val_without_honors <- sum(score_pre14_2017_NG_without_honors)/length(score_pre14_2017_NG_without_honors)
score_pre15_2017_NG_val_without_honors <- sum(score_pre15_2017_NG_without_honors)/length(score_pre15_2017_NG_without_honors)
score_pre16_2017_NG_val_without_honors <- sum(score_pre16_2017_NG_without_honors)/length(score_pre16_2017_NG_without_honors)
score_pre17_2017_NG_val_without_honors <- sum(score_pre17_2017_NG_without_honors)/length(score_pre17_2017_NG_without_honors)
score_pre18_2017_NG_val_without_honors <- sum(score_pre18_2017_NG_without_honors)/length(score_pre18_2017_NG_without_honors)
score_pre19_2017_NG_val_without_honors <- sum(score_pre19_2017_NG_without_honors)/length(score_pre19_2017_NG_without_honors)
score_pre20_2017_NG_val_without_honors <- sum(score_pre20_2017_NG_without_honors)/length(score_pre20_2017_NG_without_honors)
score_pre21_2017_NG_val_without_honors <- sum(score_pre21_2017_NG_without_honors)/length(score_pre21_2017_NG_without_honors)
score_pre22_2017_NG_val_without_honors <- sum(score_pre22_2017_NG_without_honors)/length(score_pre22_2017_NG_without_honors)


#Transforms the post-recitation scores columns on each data frame into a numeric vector
score_post1_2017_G_without_honors <- as.numeric(as.character(df_2017_G_by_year_without_honors$Post_1))
score_post2_2017_G_without_honors <- as.numeric(as.character(df_2017_G_by_year_without_honors$Post_2))
score_post3_2017_G_without_honors <- as.numeric(as.character(df_2017_G_by_year_without_honors$Post_3))
score_post4_2017_G_without_honors <- as.numeric(as.character(df_2017_G_by_year_without_honors$Post_4))
score_post5_2017_G_without_honors <- as.numeric(as.character(df_2017_G_by_year_without_honors$Post_5))
score_post6_2017_G_without_honors <- as.numeric(as.character(df_2017_G_by_year_without_honors$Post_6))
score_post7_2017_G_without_honors <- as.numeric(as.character(df_2017_G_by_year_without_honors$Post_7))
score_post8_2017_G_without_honors <- as.numeric(as.character(df_2017_G_by_year_without_honors$Post_8))
score_post9_2017_G_without_honors <- as.numeric(as.character(df_2017_G_by_year_without_honors$Post_9))
score_post10_2017_G_without_honors <- as.numeric(as.character(df_2017_G_by_year_without_honors$Post_10))
score_post11_2017_G_without_honors <- as.numeric(as.character(df_2017_G_by_year_without_honors$Post_11))
score_post12_2017_G_without_honors <- as.numeric(as.character(df_2017_G_by_year_without_honors$Post_12))
score_post13_2017_G_without_honors <- as.numeric(as.character(df_2017_G_by_year_without_honors$Post_13))
score_post14_2017_G_without_honors <- as.numeric(as.character(df_2017_G_by_year_without_honors$Post_14))
score_post15_2017_G_without_honors <- as.numeric(as.character(df_2017_G_by_year_without_honors$Post_15))
score_post16_2017_G_without_honors <- as.numeric(as.character(df_2017_G_by_year_without_honors$Post_16))
score_post17_2017_G_without_honors <- as.numeric(as.character(df_2017_G_by_year_without_honors$Post_17))
score_post18_2017_G_without_honors <- as.numeric(as.character(df_2017_G_by_year_without_honors$Post_18))
score_post19_2017_G_without_honors <- as.numeric(as.character(df_2017_G_by_year_without_honors$Post_19))
score_post20_2017_G_without_honors <- as.numeric(as.character(df_2017_G_by_year_without_honors$Post_20))
score_post21_2017_G_without_honors <- as.numeric(as.character(df_2017_G_by_year_without_honors$Post_21))
score_post22_2017_G_without_honors <- as.numeric(as.character(df_2017_G_by_year_without_honors$Post_22))

score_post1_2017_NG_without_honors <- as.numeric(as.character(df_2017_NG_by_year_without_honors$Post_1))
score_post2_2017_NG_without_honors <- as.numeric(as.character(df_2017_NG_by_year_without_honors$Post_2))
score_post3_2017_NG_without_honors <- as.numeric(as.character(df_2017_NG_by_year_without_honors$Post_3))
score_post4_2017_NG_without_honors <- as.numeric(as.character(df_2017_NG_by_year_without_honors$Post_4))
score_post5_2017_NG_without_honors <- as.numeric(as.character(df_2017_NG_by_year_without_honors$Post_5))
score_post6_2017_NG_without_honors <- as.numeric(as.character(df_2017_NG_by_year_without_honors$Post_6))
score_post7_2017_NG_without_honors <- as.numeric(as.character(df_2017_NG_by_year_without_honors$Post_7))
score_post8_2017_NG_without_honors <- as.numeric(as.character(df_2017_NG_by_year_without_honors$Post_8))
score_post9_2017_NG_without_honors <- as.numeric(as.character(df_2017_NG_by_year_without_honors$Post_9))
score_post10_2017_NG_without_honors <- as.numeric(as.character(df_2017_NG_by_year_without_honors$Post_10))
score_post11_2017_NG_without_honors <- as.numeric(as.character(df_2017_NG_by_year_without_honors$Post_11))
score_post12_2017_NG_without_honors <- as.numeric(as.character(df_2017_NG_by_year_without_honors$Post_12))
score_post13_2017_NG_without_honors <- as.numeric(as.character(df_2017_NG_by_year_without_honors$Post_13))
score_post14_2017_NG_without_honors <- as.numeric(as.character(df_2017_NG_by_year_without_honors$Post_14))
score_post15_2017_NG_without_honors <- as.numeric(as.character(df_2017_NG_by_year_without_honors$Post_15))
score_post16_2017_NG_without_honors <- as.numeric(as.character(df_2017_NG_by_year_without_honors$Post_16))
score_post17_2017_NG_without_honors <- as.numeric(as.character(df_2017_NG_by_year_without_honors$Post_17))
score_post18_2017_NG_without_honors <- as.numeric(as.character(df_2017_NG_by_year_without_honors$Post_18))
score_post19_2017_NG_without_honors <- as.numeric(as.character(df_2017_NG_by_year_without_honors$Post_19))
score_post20_2017_NG_without_honors <- as.numeric(as.character(df_2017_NG_by_year_without_honors$Post_20))
score_post21_2017_NG_without_honors <- as.numeric(as.character(df_2017_NG_by_year_without_honors$Post_21))
score_post22_2017_NG_without_honors <- as.numeric(as.character(df_2017_NG_by_year_without_honors$Post_22))

#Gets score for that question
score_post1_2017_G_val_without_honors <- sum(score_post1_2017_G_without_honors)/length(score_post1_2017_G_without_honors)
score_post2_2017_G_val_without_honors <- sum(score_post2_2017_G_without_honors)/length(score_post2_2017_G_without_honors)
score_post3_2017_G_val_without_honors <- sum(score_post3_2017_G_without_honors)/length(score_post3_2017_G_without_honors)
score_post4_2017_G_val_without_honors <- sum(score_post4_2017_G_without_honors)/length(score_post4_2017_G_without_honors)
score_post5_2017_G_val_without_honors <- sum(score_post5_2017_G_without_honors)/length(score_post5_2017_G_without_honors)
score_post6_2017_G_val_without_honors <- sum(score_post6_2017_G_without_honors)/length(score_post6_2017_G_without_honors)
score_post7_2017_G_val_without_honors <- sum(score_post7_2017_G_without_honors)/length(score_post7_2017_G_without_honors)
score_post8_2017_G_val_without_honors <- sum(score_post8_2017_G_without_honors)/length(score_post8_2017_G_without_honors)
score_post9_2017_G_val_without_honors <- sum(score_post9_2017_G_without_honors)/length(score_post9_2017_G_without_honors)
score_post10_2017_G_val_without_honors <- sum(score_post10_2017_G_without_honors)/length(score_post10_2017_G_without_honors)
score_post11_2017_G_val_without_honors <- sum(score_post11_2017_G_without_honors)/length(score_post11_2017_G_without_honors)
score_post12_2017_G_val_without_honors <- sum(score_post12_2017_G_without_honors)/length(score_post12_2017_G_without_honors)
score_post13_2017_G_val_without_honors <- sum(score_post13_2017_G_without_honors)/length(score_post13_2017_G_without_honors)
score_post14_2017_G_val_without_honors <- sum(score_post14_2017_G_without_honors)/length(score_post14_2017_G_without_honors)
score_post15_2017_G_val_without_honors <- sum(score_post15_2017_G_without_honors)/length(score_post15_2017_G_without_honors)
score_post16_2017_G_val_without_honors <- sum(score_post16_2017_G_without_honors)/length(score_post16_2017_G_without_honors)
score_post17_2017_G_val_without_honors <- sum(score_post17_2017_G_without_honors)/length(score_post17_2017_G_without_honors)
score_post18_2017_G_val_without_honors <- sum(score_post18_2017_G_without_honors)/length(score_post18_2017_G_without_honors)
score_post19_2017_G_val_without_honors <- sum(score_post19_2017_G_without_honors)/length(score_post19_2017_G_without_honors)
score_post20_2017_G_val_without_honors <- sum(score_post20_2017_G_without_honors)/length(score_post20_2017_G_without_honors)
score_post21_2017_G_val_without_honors <- sum(score_post21_2017_G_without_honors)/length(score_post21_2017_G_without_honors)
score_post22_2017_G_val_without_honors <- sum(score_post22_2017_G_without_honors)/length(score_post22_2017_G_without_honors)

score_post1_2017_NG_val_without_honors <- sum(score_post1_2017_NG_without_honors)/length(score_post1_2017_NG_without_honors)
score_post2_2017_NG_val_without_honors <- sum(score_post2_2017_NG_without_honors)/length(score_post2_2017_NG_without_honors)
score_post3_2017_NG_val_without_honors <- sum(score_post3_2017_NG_without_honors)/length(score_post3_2017_NG_without_honors)
score_post4_2017_NG_val_without_honors <- sum(score_post4_2017_NG_without_honors)/length(score_post4_2017_NG_without_honors)
score_post5_2017_NG_val_without_honors <- sum(score_post5_2017_NG_without_honors)/length(score_post5_2017_NG_without_honors)
score_post6_2017_NG_val_without_honors <- sum(score_post6_2017_NG_without_honors)/length(score_post6_2017_NG_without_honors)
score_post7_2017_NG_val_without_honors <- sum(score_post7_2017_NG_without_honors)/length(score_post7_2017_NG_without_honors)
score_post8_2017_NG_val_without_honors <- sum(score_post8_2017_NG_without_honors)/length(score_post8_2017_NG_without_honors)
score_post9_2017_NG_val_without_honors <- sum(score_post9_2017_NG_without_honors)/length(score_post9_2017_NG_without_honors)
score_post10_2017_NG_val_without_honors <- sum(score_post10_2017_NG_without_honors)/length(score_post10_2017_NG_without_honors)
score_post11_2017_NG_val_without_honors <- sum(score_post11_2017_NG_without_honors)/length(score_post11_2017_NG_without_honors)
score_post12_2017_NG_val_without_honors <- sum(score_post12_2017_NG_without_honors)/length(score_post12_2017_NG_without_honors)
score_post13_2017_NG_val_without_honors <- sum(score_post13_2017_NG_without_honors)/length(score_post13_2017_NG_without_honors)
score_post14_2017_NG_val_without_honors <- sum(score_post14_2017_NG_without_honors)/length(score_post14_2017_NG_without_honors)
score_post15_2017_NG_val_without_honors <- sum(score_post15_2017_NG_without_honors)/length(score_post15_2017_NG_without_honors)
score_post16_2017_NG_val_without_honors <- sum(score_post16_2017_NG_without_honors)/length(score_post16_2017_NG_without_honors)
score_post17_2017_NG_val_without_honors <- sum(score_post17_2017_NG_without_honors)/length(score_post17_2017_NG_without_honors)
score_post18_2017_NG_val_without_honors <- sum(score_post18_2017_NG_without_honors)/length(score_post18_2017_NG_without_honors)
score_post19_2017_NG_val_without_honors <- sum(score_post19_2017_NG_without_honors)/length(score_post19_2017_NG_without_honors)
score_post20_2017_NG_val_without_honors <- sum(score_post20_2017_NG_without_honors)/length(score_post20_2017_NG_without_honors)
score_post21_2017_NG_val_without_honors <- sum(score_post21_2017_NG_without_honors)/length(score_post21_2017_NG_without_honors)
score_post22_2017_NG_val_without_honors <- sum(score_post22_2017_NG_without_honors)/length(score_post22_2017_NG_without_honors)


#Preparing vectors for the dataframe
#Order based on Figure2a -Key concepts| Table 3 - Misconceptions
questionA2T3 <- c("Q1","Q3","Q15","Q4","Q10","Q13","Q16","Q7","Q5","Q6","Q8","Q2","Q9","Q12","Q17","Q20","Q14","Q19","Q22","Q11","Q18","Q21")
time_pre <- rep("Pre", 22)
time_post <- rep("Post", 22)

#Vector of pre-recitation and post-recitation scores by question on 2017 genie classes
pre_recitation_scores_2017_G_without_honorsA2T3 <- c(score_pre1_2017_G_val_without_honors,
                                  score_pre3_2017_G_val_without_honors,
                                  score_pre15_2017_G_val_without_honors,
                                  score_pre4_2017_G_val_without_honors,
                                  score_pre10_2017_G_val_without_honors,
                                  score_pre13_2017_G_val_without_honors,
                                  score_pre16_2017_G_val_without_honors,
                                  score_pre7_2017_G_val_without_honors,
                                  score_pre5_2017_G_val_without_honors,
                                  score_pre6_2017_G_val_without_honors,
                                  score_pre8_2017_G_val_without_honors,
                                  score_pre2_2017_G_val_without_honors,
                                  score_pre9_2017_G_val_without_honors,
                                  score_pre12_2017_G_val_without_honors,
                                  score_pre17_2017_G_val_without_honors,
                                  score_pre20_2017_G_val_without_honors,
                                  score_pre14_2017_G_val_without_honors,
                                  score_pre19_2017_G_val_without_honors,
                                  score_pre22_2017_G_val_without_honors,
                                  score_pre11_2017_G_val_without_honors,
                                  score_pre18_2017_G_val_without_honors,
                                  score_pre21_2017_G_val_without_honors)


post_recitation_scores_2017_G_without_honorsA2T3 <- c(score_post1_2017_G_val_without_honors,
                                   score_post3_2017_G_val_without_honors,
                                   score_post15_2017_G_val_without_honors,
                                   score_post4_2017_G_val_without_honors,
                                   score_post10_2017_G_val_without_honors,
                                   score_post13_2017_G_val_without_honors,
                                   score_post16_2017_G_val_without_honors,
                                   score_post7_2017_G_val_without_honors,
                                   score_post5_2017_G_val_without_honors,
                                   score_post6_2017_G_val_without_honors,
                                   score_post8_2017_G_val_without_honors,
                                   score_post2_2017_G_val_without_honors,
                                   score_post9_2017_G_val_without_honors,
                                   score_post12_2017_G_val_without_honors,
                                   score_post17_2017_G_val_without_honors,
                                   score_post20_2017_G_val_without_honors,
                                   score_post14_2017_G_val_without_honors,
                                   score_post19_2017_G_val_without_honors,
                                   score_post22_2017_G_val_without_honors,
                                   score_post11_2017_G_val_without_honors,
                                   score_post18_2017_G_val_without_honors,
                                   score_post21_2017_G_val_without_honors)

#Pre, post-, and combined recitations dataframes for plot 2017 genie class
df_scores_by_question_pre_2017_G_without_honorsA2T3 <- data.frame(scores_2017_G_without_honors = pre_recitation_scores_2017_G_without_honorsA2T3,
                                               time_of_recitation = time_pre,
                                               question=questionA2T3)

df_scores_by_question_post_2017_G_without_honorsA2T3 <- data.frame(scores_2017_G_without_honors = post_recitation_scores_2017_G_without_honorsA2T3,
                                                time_of_recitation = time_post,
                                                question=questionA2T3)

df_scores_by_question_combined_2017_G_without_honorsA2T3 <- rbind(df_scores_by_question_pre_2017_G_without_honorsA2T3, df_scores_by_question_post_2017_G_without_honorsA2T3)


#Vector of pre-recitation and post-recitation scores by question on 2017 no genie classes
pre_recitation_scores_2017_NGA2T3 <- c(score_pre1_2017_NG_val_without_honors,
                                   score_pre3_2017_NG_val_without_honors,
                                   score_pre15_2017_NG_val_without_honors,
                                   score_pre4_2017_NG_val_without_honors,
                                   score_pre10_2017_NG_val_without_honors,
                                   score_pre13_2017_NG_val_without_honors,
                                   score_pre16_2017_NG_val_without_honors,
                                   score_pre7_2017_NG_val_without_honors,
                                   score_pre5_2017_NG_val_without_honors,
                                   score_pre6_2017_NG_val_without_honors,
                                   score_pre8_2017_NG_val_without_honors,
                                   score_pre2_2017_NG_val_without_honors,
                                   score_pre9_2017_NG_val_without_honors,
                                   score_pre12_2017_NG_val_without_honors,
                                   score_pre17_2017_NG_val_without_honors,
                                   score_pre20_2017_NG_val_without_honors,
                                   score_pre14_2017_NG_val_without_honors,
                                   score_pre19_2017_NG_val_without_honors,
                                   score_pre22_2017_NG_val_without_honors,
                                   score_pre11_2017_NG_val_without_honors,
                                   score_pre18_2017_NG_val_without_honors,
                                   score_pre21_2017_NG_val_without_honors)

post_recitation_scores_2017_NGA2T3 <- c(score_post1_2017_NG_val_without_honors,
                                    score_post3_2017_NG_val_without_honors,
                                    score_post15_2017_NG_val_without_honors,
                                    score_post4_2017_NG_val_without_honors,
                                    score_post10_2017_NG_val_without_honors,
                                    score_post13_2017_NG_val_without_honors,
                                    score_post16_2017_NG_val_without_honors,
                                    score_post7_2017_NG_val_without_honors,
                                    score_post5_2017_NG_val_without_honors,
                                    score_post6_2017_NG_val_without_honors,
                                    score_post8_2017_NG_val_without_honors,
                                    score_post2_2017_NG_val_without_honors,
                                    score_post9_2017_NG_val_without_honors,
                                    score_post12_2017_NG_val_without_honors,
                                    score_post17_2017_NG_val_without_honors,
                                    score_post20_2017_NG_val_without_honors,
                                    score_post14_2017_NG_val_without_honors,
                                    score_post19_2017_NG_val_without_honors,
                                    score_post22_2017_NG_val_without_honors,
                                    score_post11_2017_NG_val_without_honors,
                                    score_post18_2017_NG_val_without_honors,
                                    score_post21_2017_NG_val_without_honors)


#Pre, post-, and combined recitations dataframes for plot 2017 no genie class
df_scores_by_question_pre_2017_NGA2T3 <- data.frame(scores_2017_NG = pre_recitation_scores_2017_NGA2T3,
                                                time_of_recitation = time_pre,
                                                question=questionA2T3)

df_scores_by_question_post_2017_NGA2T3 <- data.frame(scores_2017_NG = post_recitation_scores_2017_NGA2T3,
                                                 time_of_recitation = time_post,
                                                 question=questionA2T3)

df_scores_by_question_combined_2017_NGA2T3 <- rbind(df_scores_by_question_pre_2017_NGA2T3, df_scores_by_question_post_2017_NGA2T3)


#Diff without honors
score_diff1_2017_G_without_honors <- score_post1_2017_G_val_without_honors-score_pre1_2017_G_val_without_honors
score_diff2_2017_G_without_honors <- score_post2_2017_G_val_without_honors-score_pre2_2017_G_val_without_honors
score_diff3_2017_G_without_honors <- score_post3_2017_G_val_without_honors-score_pre3_2017_G_val_without_honors
score_diff4_2017_G_without_honors <- score_post4_2017_G_val_without_honors-score_pre4_2017_G_val_without_honors
score_diff5_2017_G_without_honors <- score_post5_2017_G_val_without_honors-score_pre5_2017_G_val_without_honors
score_diff6_2017_G_without_honors <- score_post6_2017_G_val_without_honors-score_pre6_2017_G_val_without_honors
score_diff7_2017_G_without_honors <- score_post7_2017_G_val_without_honors-score_pre7_2017_G_val_without_honors
score_diff8_2017_G_without_honors <- score_post8_2017_G_val_without_honors-score_pre8_2017_G_val_without_honors
score_diff9_2017_G_without_honors <- score_post9_2017_G_val_without_honors-score_pre9_2017_G_val_without_honors
score_diff10_2017_G_without_honors <- score_post10_2017_G_val_without_honors-score_pre10_2017_G_val_without_honors
score_diff11_2017_G_without_honors <- score_post11_2017_G_val_without_honors-score_pre11_2017_G_val_without_honors
score_diff12_2017_G_without_honors <- score_post12_2017_G_val_without_honors-score_pre12_2017_G_val_without_honors
score_diff13_2017_G_without_honors <- score_post13_2017_G_val_without_honors-score_pre13_2017_G_val_without_honors
score_diff14_2017_G_without_honors <- score_post14_2017_G_val_without_honors-score_pre14_2017_G_val_without_honors
score_diff15_2017_G_without_honors <- score_post15_2017_G_val_without_honors-score_pre15_2017_G_val_without_honors
score_diff16_2017_G_without_honors <- score_post16_2017_G_val_without_honors-score_pre16_2017_G_val_without_honors
score_diff17_2017_G_without_honors <- score_post17_2017_G_val_without_honors-score_pre17_2017_G_val_without_honors
score_diff18_2017_G_without_honors <- score_post18_2017_G_val_without_honors-score_pre18_2017_G_val_without_honors
score_diff19_2017_G_without_honors <- score_post19_2017_G_val_without_honors-score_pre19_2017_G_val_without_honors
score_diff20_2017_G_without_honors <- score_post20_2017_G_val_without_honors-score_pre20_2017_G_val_without_honors
score_diff21_2017_G_without_honors <- score_post21_2017_G_val_without_honors-score_pre21_2017_G_val_without_honors
score_diff22_2017_G_without_honors <- score_post22_2017_G_val_without_honors-score_pre22_2017_G_val_without_honors


diff_recitation_scores_2017_G_without_honors2AT3 <- c(score_diff1_2017_G_without_honors,
                                   score_diff3_2017_G_without_honors,
                                   score_diff4_2017_G_without_honors,
                                   score_diff10_2017_G_without_honors,
                                   score_diff13_2017_G_without_honors,
                                   score_diff15_2017_G_without_honors,
                                   score_diff16_2017_G_without_honors,
                                   score_diff7_2017_G_without_honors,
                                   score_diff5_2017_G_without_honors,
                                   score_diff6_2017_G_without_honors,
                                   score_diff8_2017_G_without_honors,
                                   score_diff2_2017_G_without_honors,
                                   score_diff9_2017_G_without_honors,
                                   score_diff12_2017_G_without_honors,
                                   score_diff17_2017_G_without_honors,
                                   score_diff20_2017_G_without_honors,
                                   score_diff14_2017_G_without_honors,
                                   score_diff19_2017_G_without_honors,
                                   score_diff22_2017_G_without_honors,
                                   score_diff11_2017_G_without_honors,
                                   score_diff18_2017_G_without_honors,
                                   score_diff21_2017_G_without_honors)


diff_recitation_scores_2017_G_without_honorsA2 <- c(score_diff1_2017_G_without_honors,
                                                  score_diff3_2017_G_without_honors,
                                                  score_diff4_2017_G_without_honors,
                                                  score_diff10_2017_G_without_honors,
                                                  score_diff13_2017_G_without_honors,
                                                  score_diff15_2017_G_without_honors,
                                                  score_diff16_2017_G_without_honors,
                                                  score_diff21_2017_G_without_honors,
                                                  score_diff22_2017_G_without_honors,
                                                  score_diff19_2017_G_without_honors,
                                                  score_diff7_2017_G_without_honors,
                                                  score_diff9_2017_G_without_honors,
                                                  score_diff20_2017_G_without_honors,
                                                  score_diff18_2017_G_without_honors,
                                                  score_diff11_2017_G_without_honors,
                                                  score_diff2_2017_G_without_honors,
                                                  score_diff14_2017_G_without_honors,
                                                  score_diff5_2017_G_without_honors,
                                                  score_diff17_2017_G_without_honors,
                                                  score_diff12_2017_G_without_honors,
                                                  score_diff6_2017_G_without_honors,
                                                  score_diff8_2017_G_without_honors)


###Order Fig2|Table3 in Price et al 2014
time_diffG <- rep("Diff-score Genie", 22)
time_diffNG <- rep("Diff-score no Genie", 22)

df_diff_scores_by_question_G_without_honors2AT3 <- data.frame(diff_recitation_scores = diff_recitation_scores_2017_G_without_honors2AT3,
                                                           question=question2AT3,
                                                           time=time_diffG)

df_diff_scores_by_question_NG2AT3 <- data.frame(diff_recitation_scores = diff_recitation_scores_2017_NG2AT3,
                                            question=question2AT3,
                                            time=time_diffNG)


df_diff_scores_by_question_G_without_honors2AT3$question <- factor(df_diff_scores_by_question_G_without_honors2AT3$question,
                                                               levels = df_diff_scores_by_question_G_without_honors2AT3$question)

df_diff_scores_by_question_NG2AT3$question <- factor(df_diff_scores_by_question_NG2AT3$question,
                                                  levels = df_diff_scores_by_question_NG2AT3$question)

df_diff_scores_by_question_combined2AT3 <- rbind(df_diff_scores_by_question_G_without_honors2AT3, df_diff_scores_by_question_NG2AT3)


pdf(file="nohonors_F3.pdf")

my_purple_colors <- c("orchid4","plum")
diff_per_question_plot2AT3 <- ggplot(data=df_diff_scores_by_question_combined2AT3, aes(x=question, y=diff_recitation_scores, fill=time)) +
  geom_bar(width=0.4, stat="identity", position=position_dodge(0.5)) +
  scale_fill_manual(values = my_purple_colors) +
  xlab("Question") +
  ylab("Scores") +
  labs(fill = "Recitation") +
  scale_x_discrete(limits= df_diff_scores_by_question_combined2AT3$p.question) + 
  theme(panel.grid.major = element_blank(), panel.grid.minor = element_blank(),
        panel.background = element_blank(), axis.line = element_line(colour = "black"))


print(diff_per_question_plot2AT3)
dev.off()

time_postG <- rep("Post-score Genie", 22)
time_postNG <- rep("Post-score no Genie", 22)

df_post_scores_by_question_G_without_honors2AT3 <- data.frame(post_recitation_scores = post_recitation_scores_2017_G_without_honorsA2T3,
                                                          question=question2AT3,
                                                          time=time_postG)

df_post_scores_by_question_NG2AT3 <- data.frame(post_recitation_scores = post_recitation_scores_2017_NG2AT3,
                                            question=question2AT3,
                                            time=time_postNG)


df_post_scores_by_question_G_without_honors2AT3$question <- factor(df_post_scores_by_question_G_without_honors2AT3$question,
                                                               levels = df_post_scores_by_question_G_without_honors2AT3$question)

df_post_scores_by_question_NG2AT3$question <- factor(df_post_scores_by_question_NG2AT3$question,
                                                 levels = df_post_scores_by_question_NG2AT3$question)

df_post_scores_by_question_combined2AT3 <- rbind(df_post_scores_by_question_G_without_honors2AT3, df_post_scores_by_question_NG2AT3)


pdf(file="nohonors_F2.pdf")

my_green_colors <- c("darkgreen","darkseagreen3")
post_per_question_plot2AT3 <- ggplot(data=df_post_scores_by_question_combined2AT3, aes(x=question, y=post_recitation_scores, fill=time)) +
  geom_bar(width=0.4, stat="identity", position=position_dodge(0.5)) +
  scale_fill_manual(values = my_green_colors) +
  xlab("Question") +
  ylab("Scores") +
  labs(fill = "Recitation") +
  scale_x_discrete(limits= df_post_scores_by_question_combined2AT3$p.question) +
  theme(panel.grid.major = element_blank(), panel.grid.minor = element_blank(),
      panel.background = element_blank(), axis.line = element_line(colour = "black"))


print(post_per_question_plot2AT3)
dev.off()
